# Supplementary figures and images for: New Classification of Collective Animal Behaviour as an Autonomous System
Source: Preprints.org preprint supplement (doi:10.20944/preprints201902.0269.v1), 2019-02-28

$\Delta t=5/120$

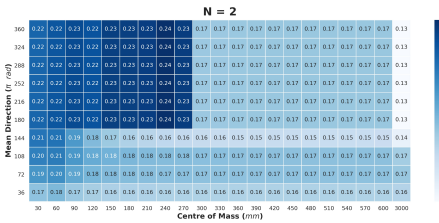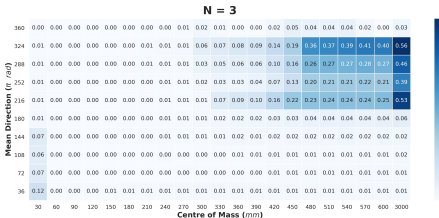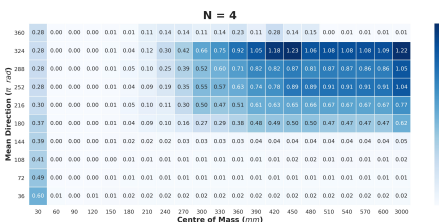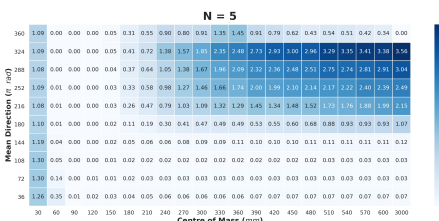

$\Delta t=40/120$

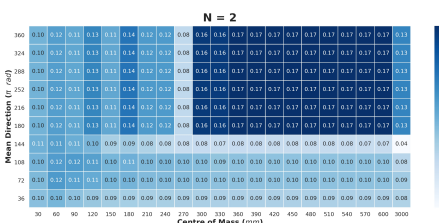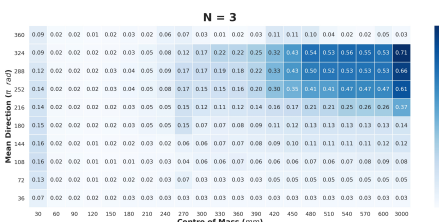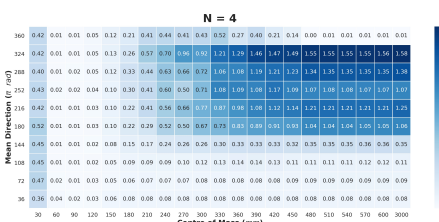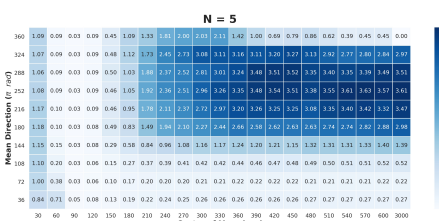

$\Delta t=10/120$

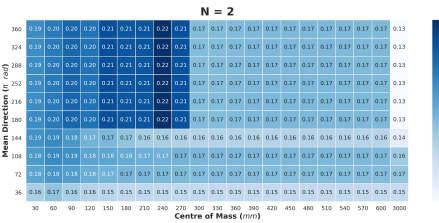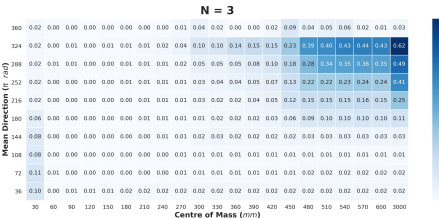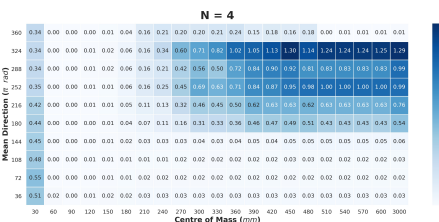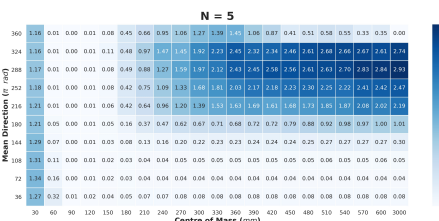

$\Delta t=80/120$

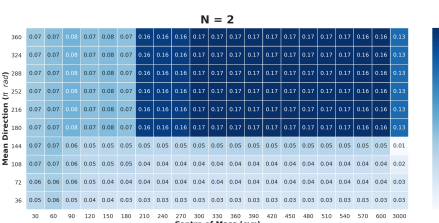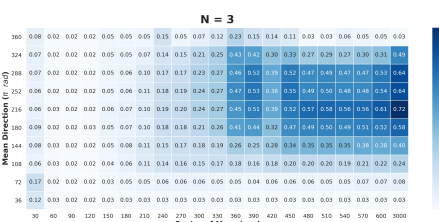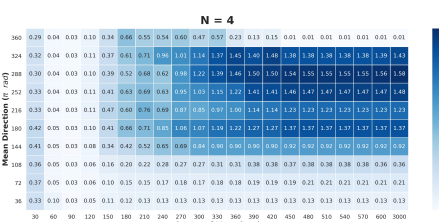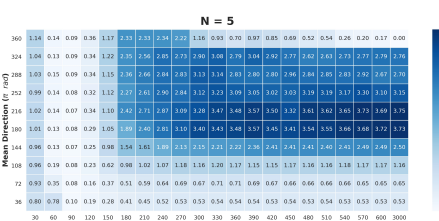

$\Delta t=20/120$

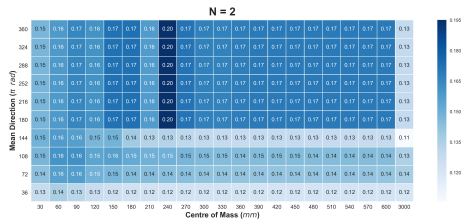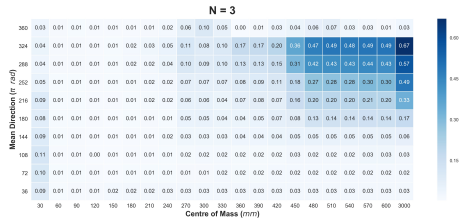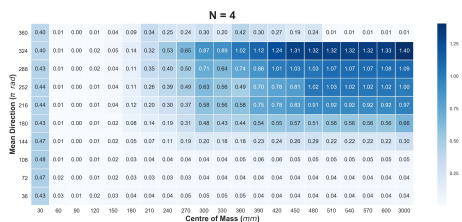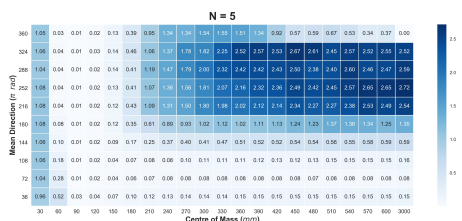

$\Delta t=120/120$

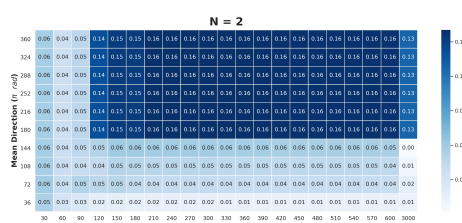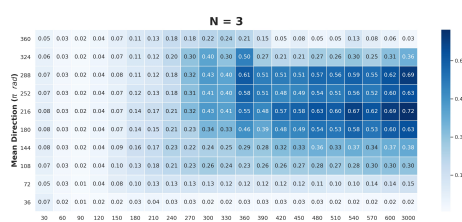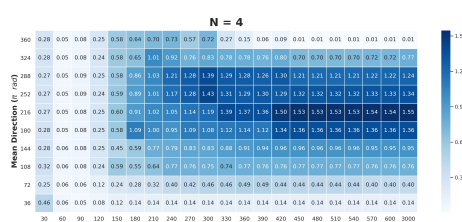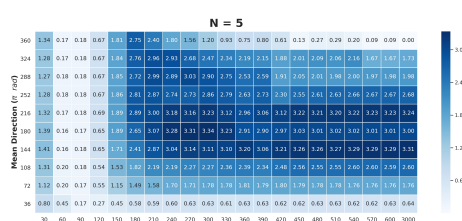

Supplement: Supplementary file 1 [file supplementary]

6/120

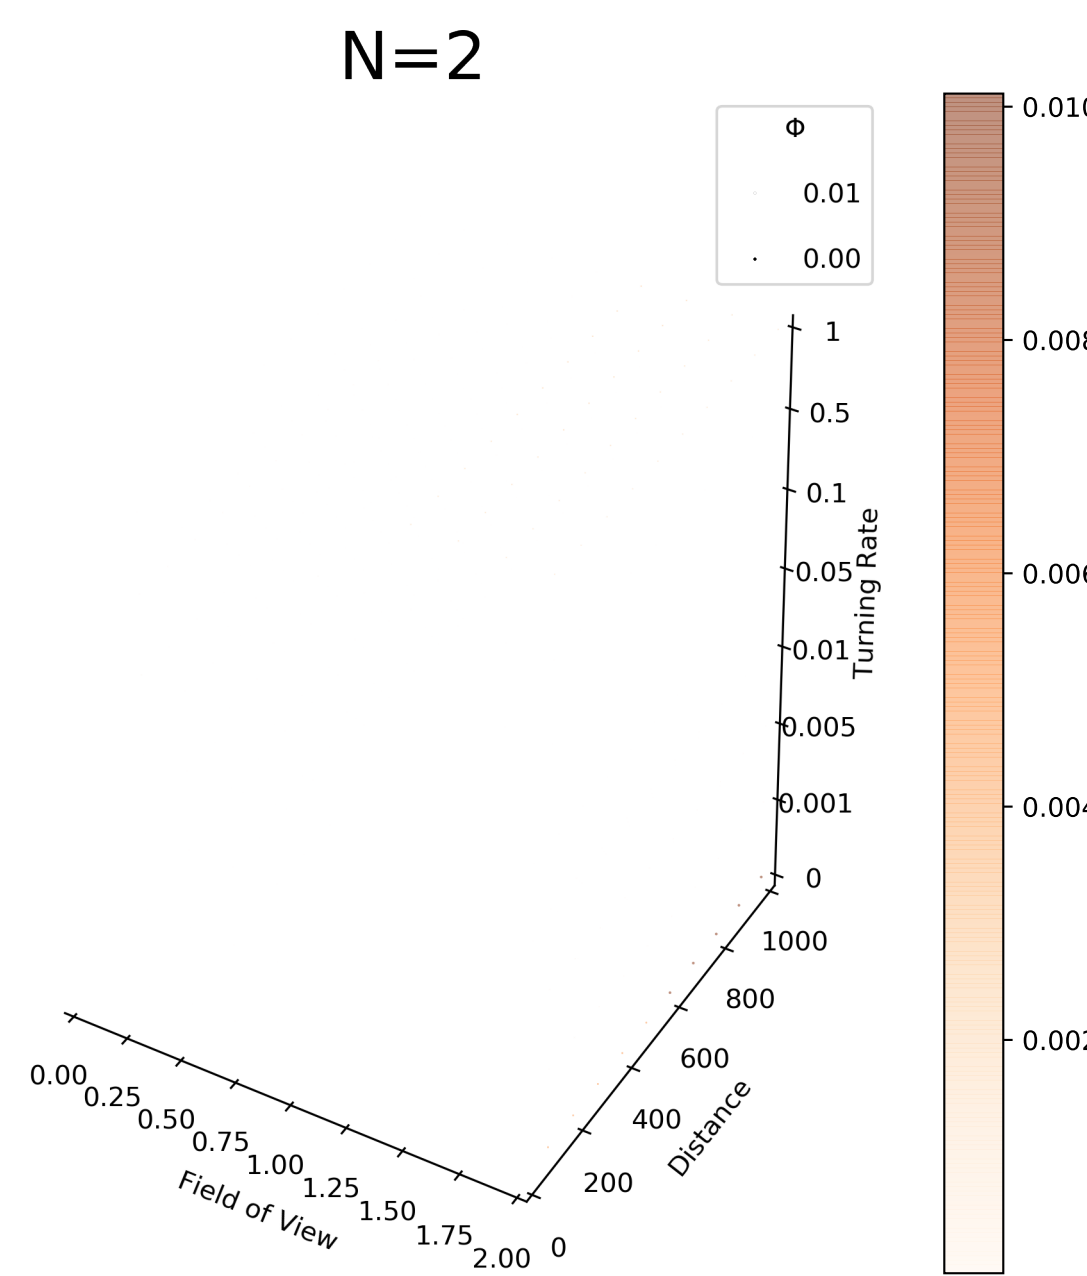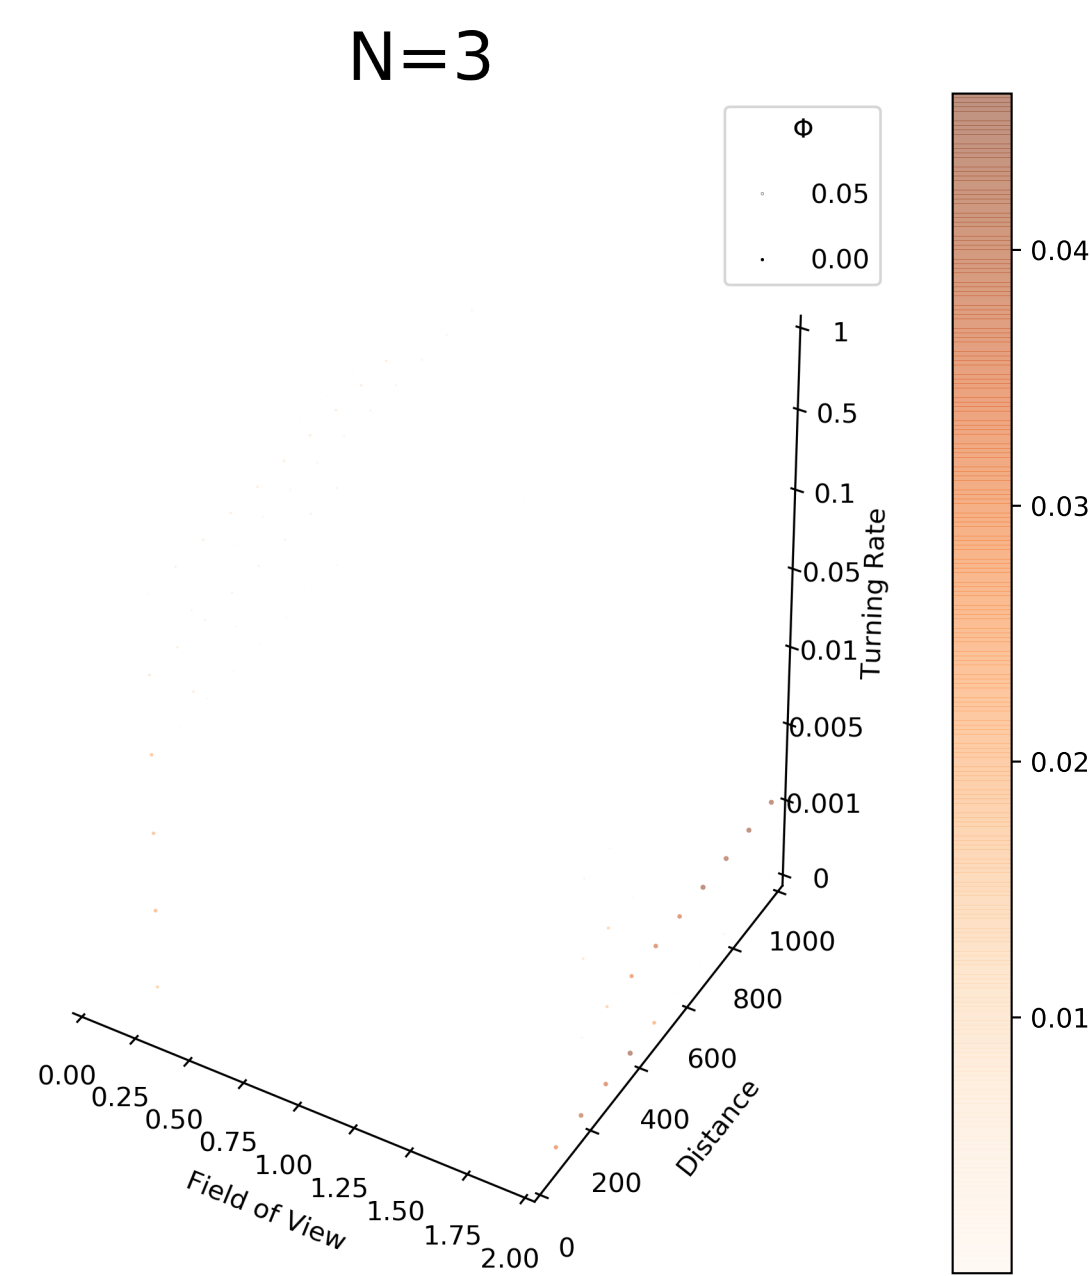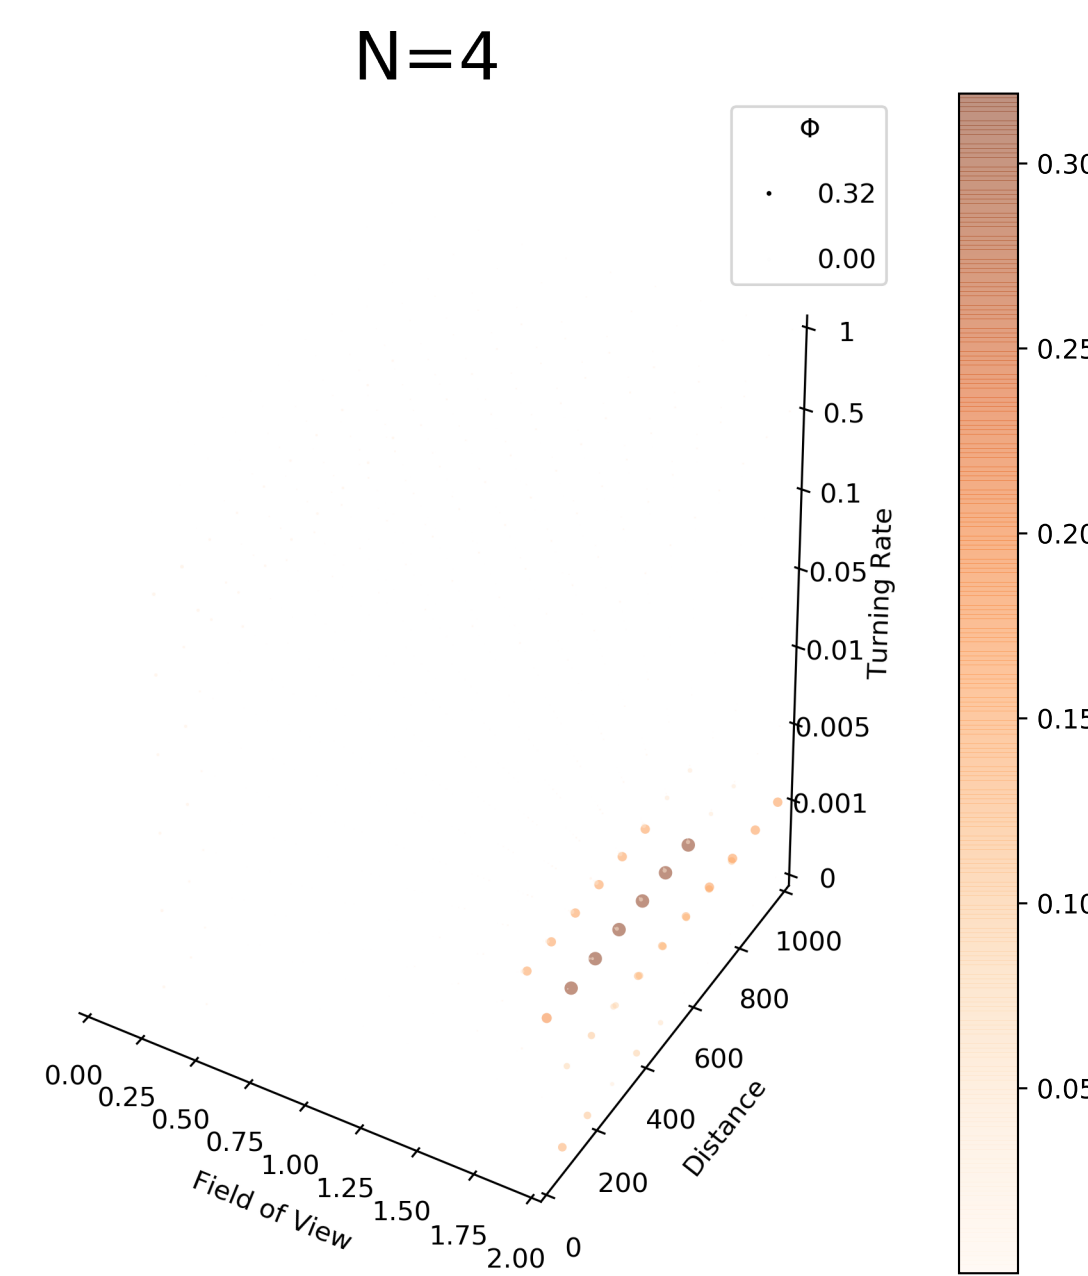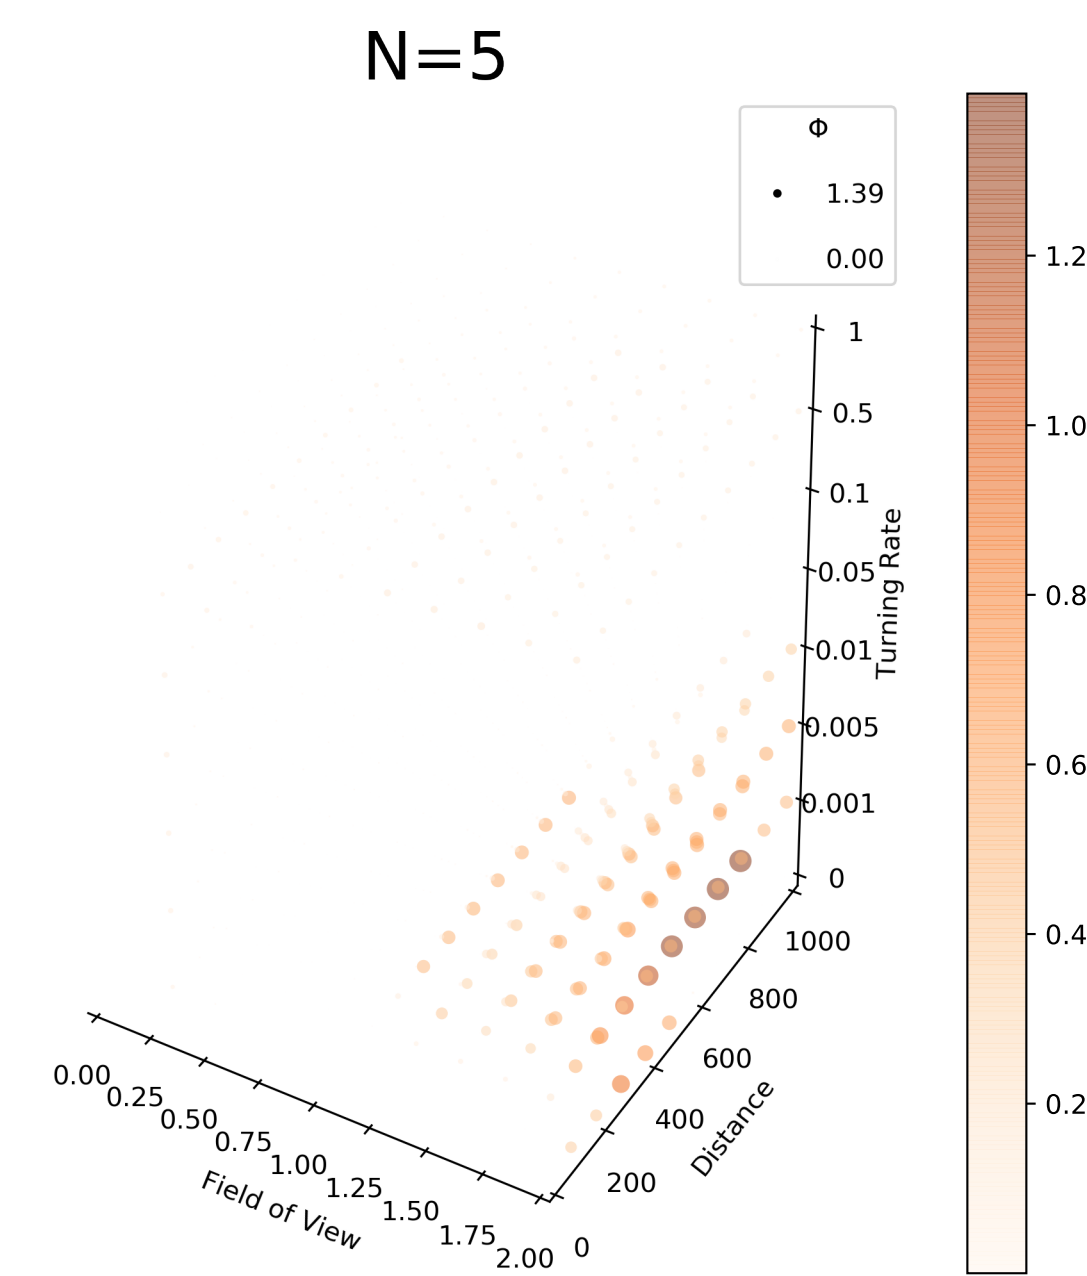

10/120

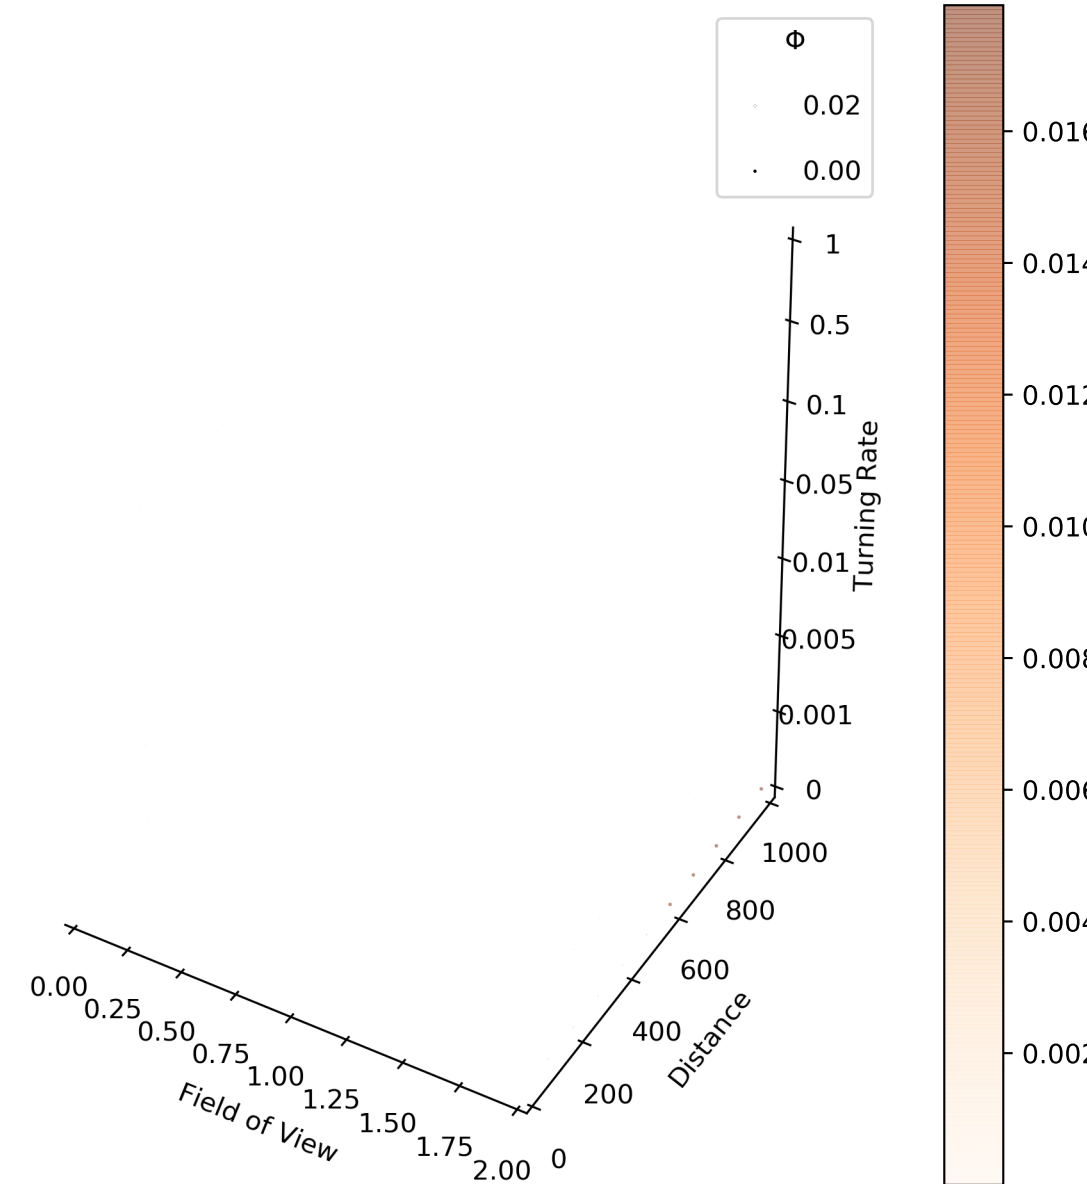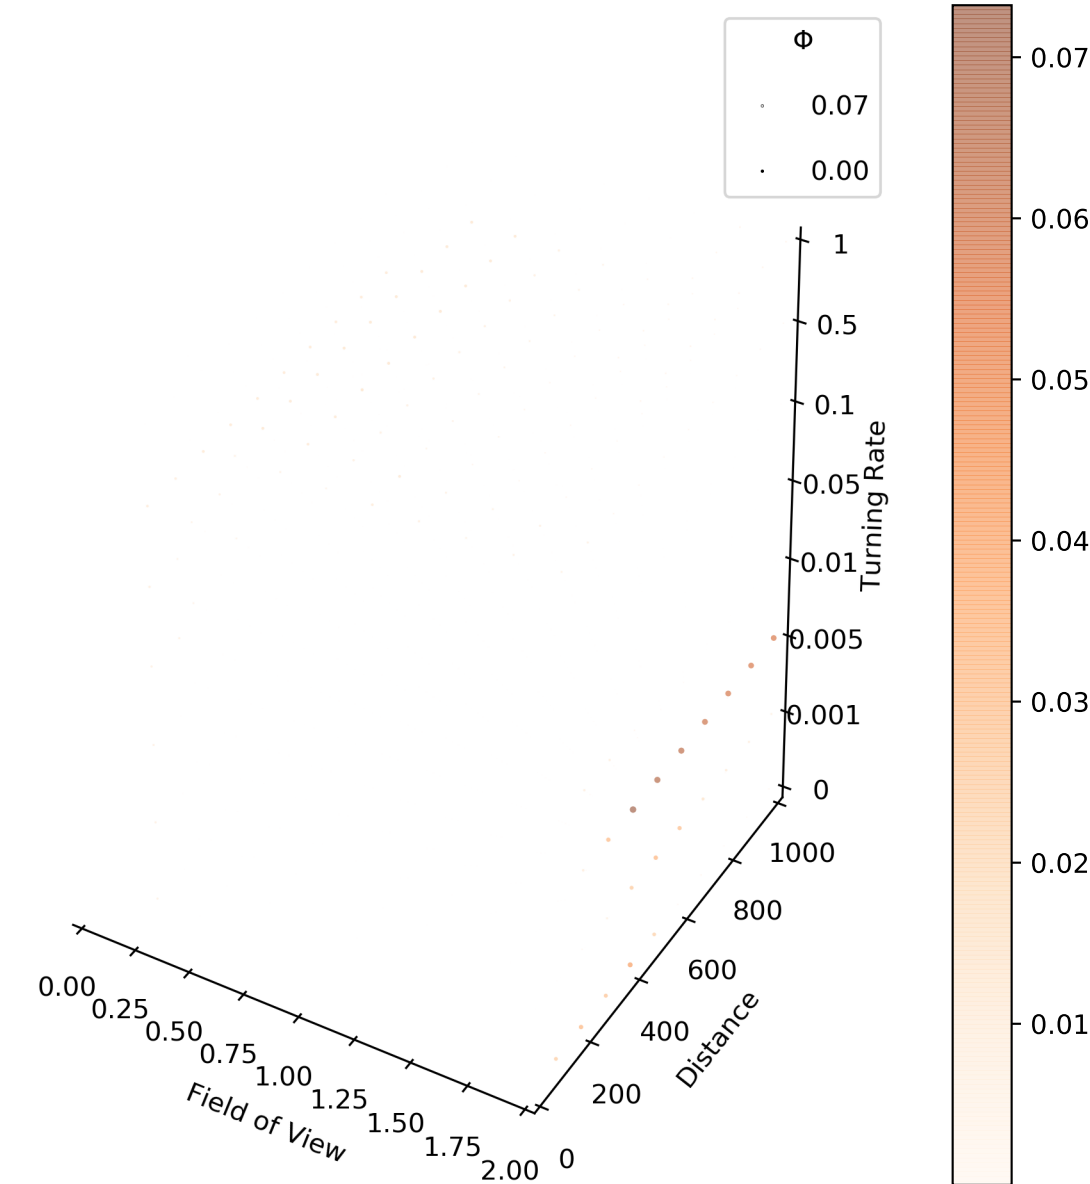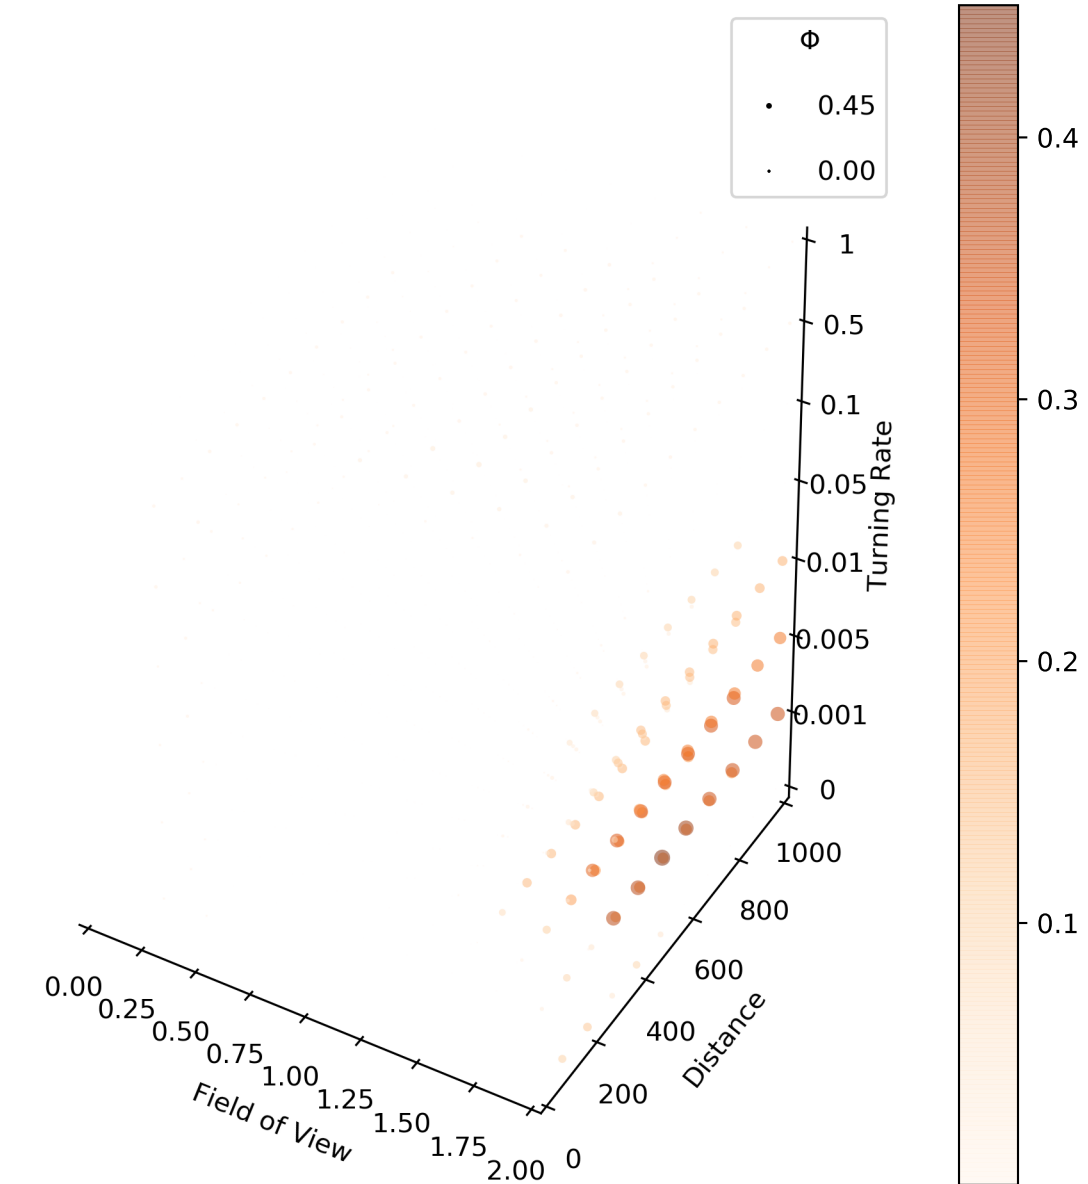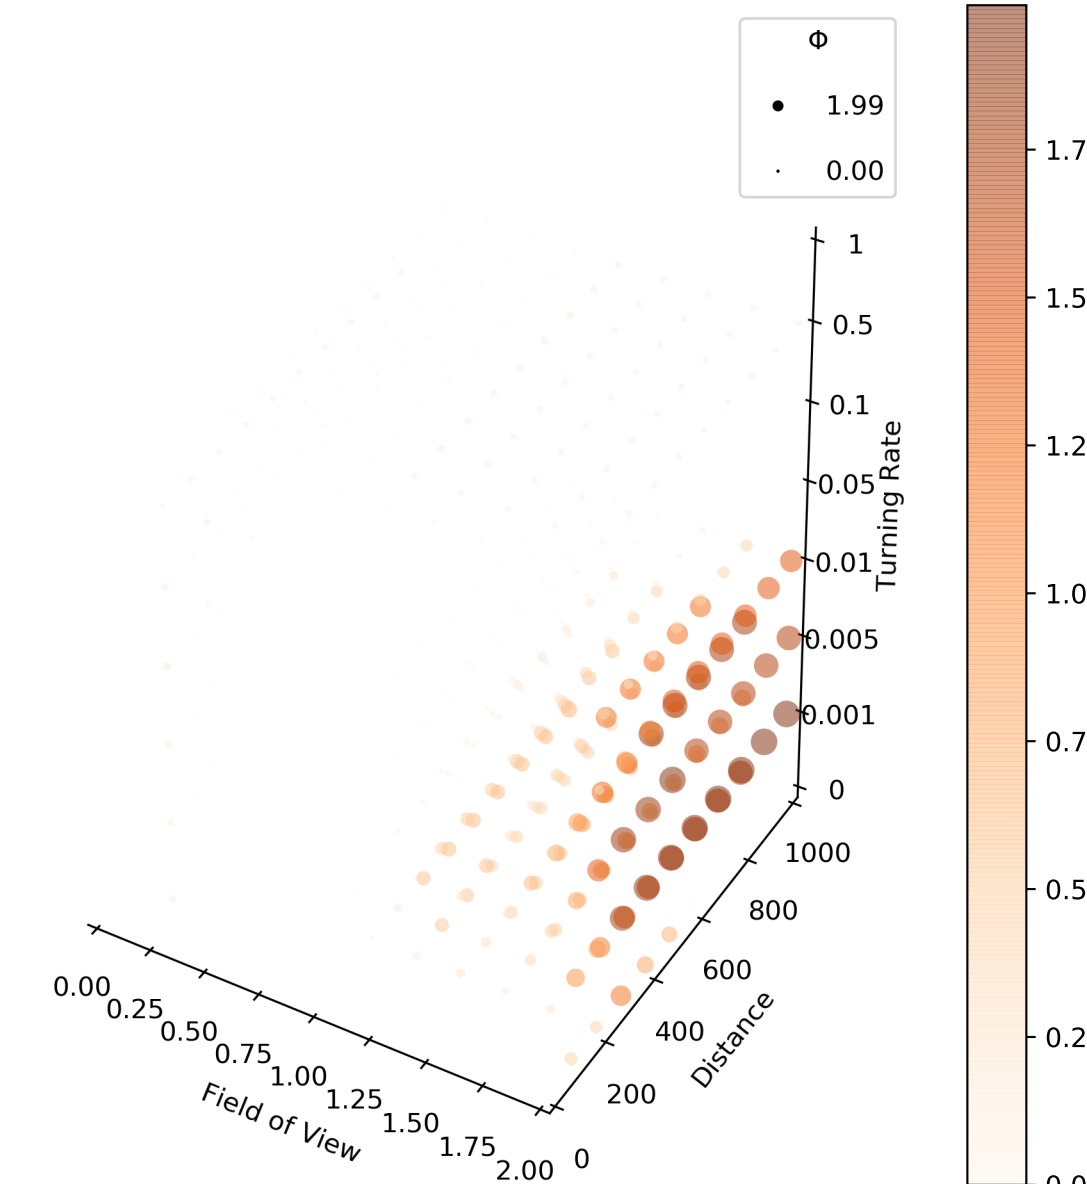

20/120

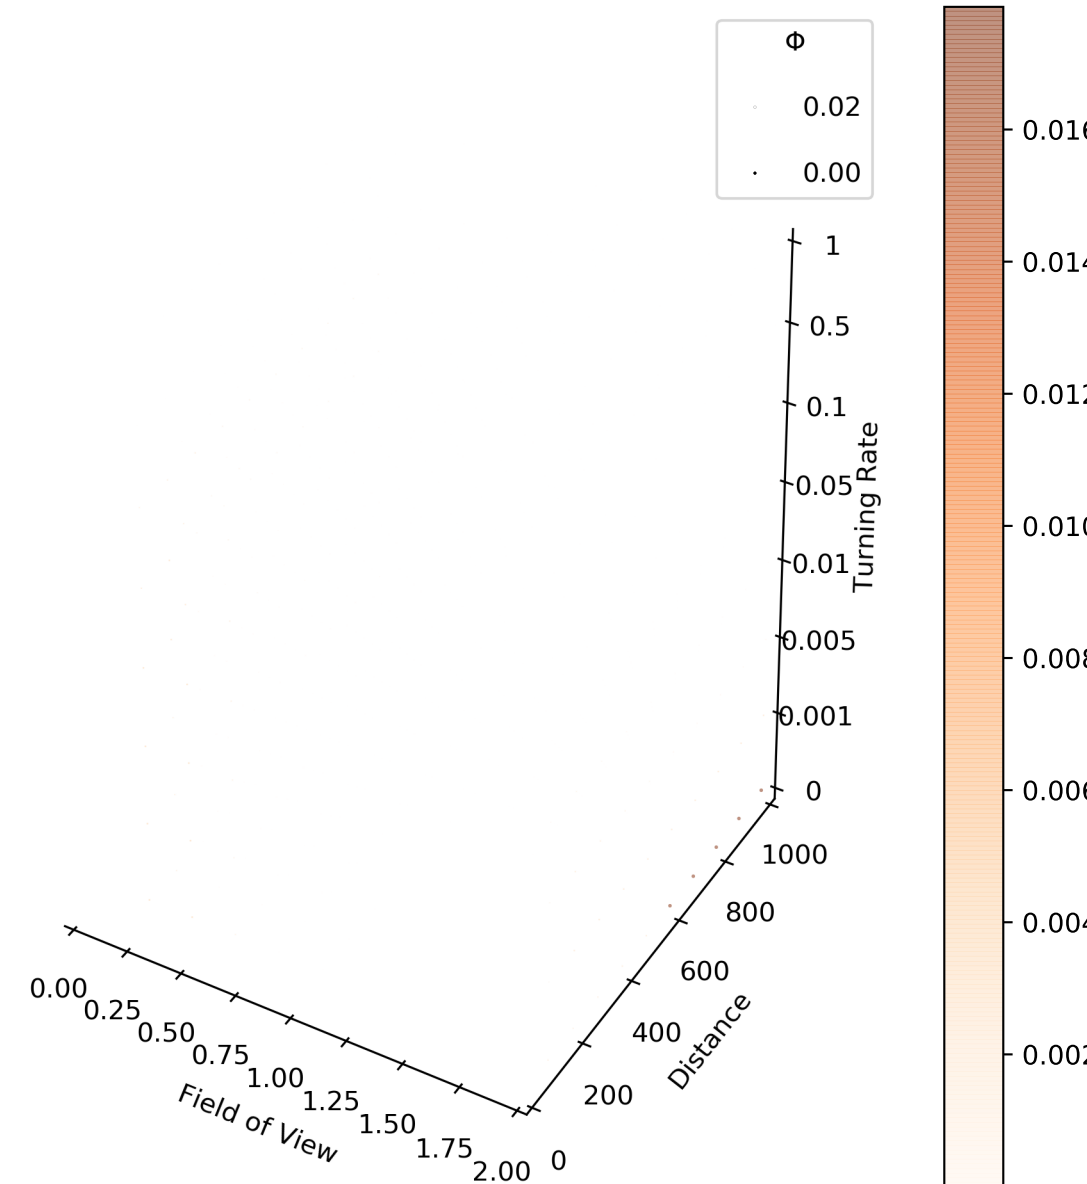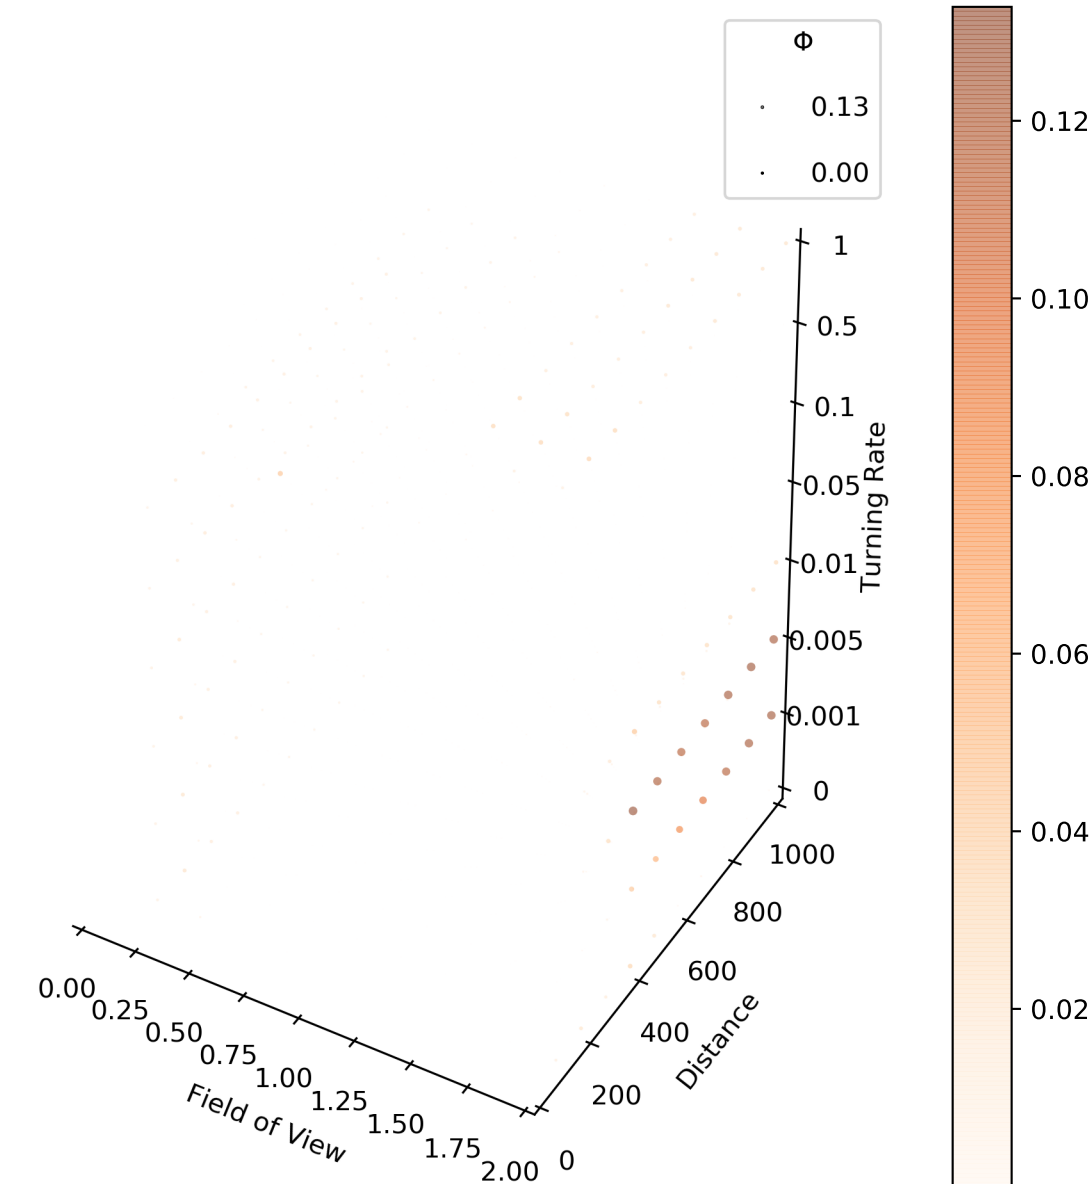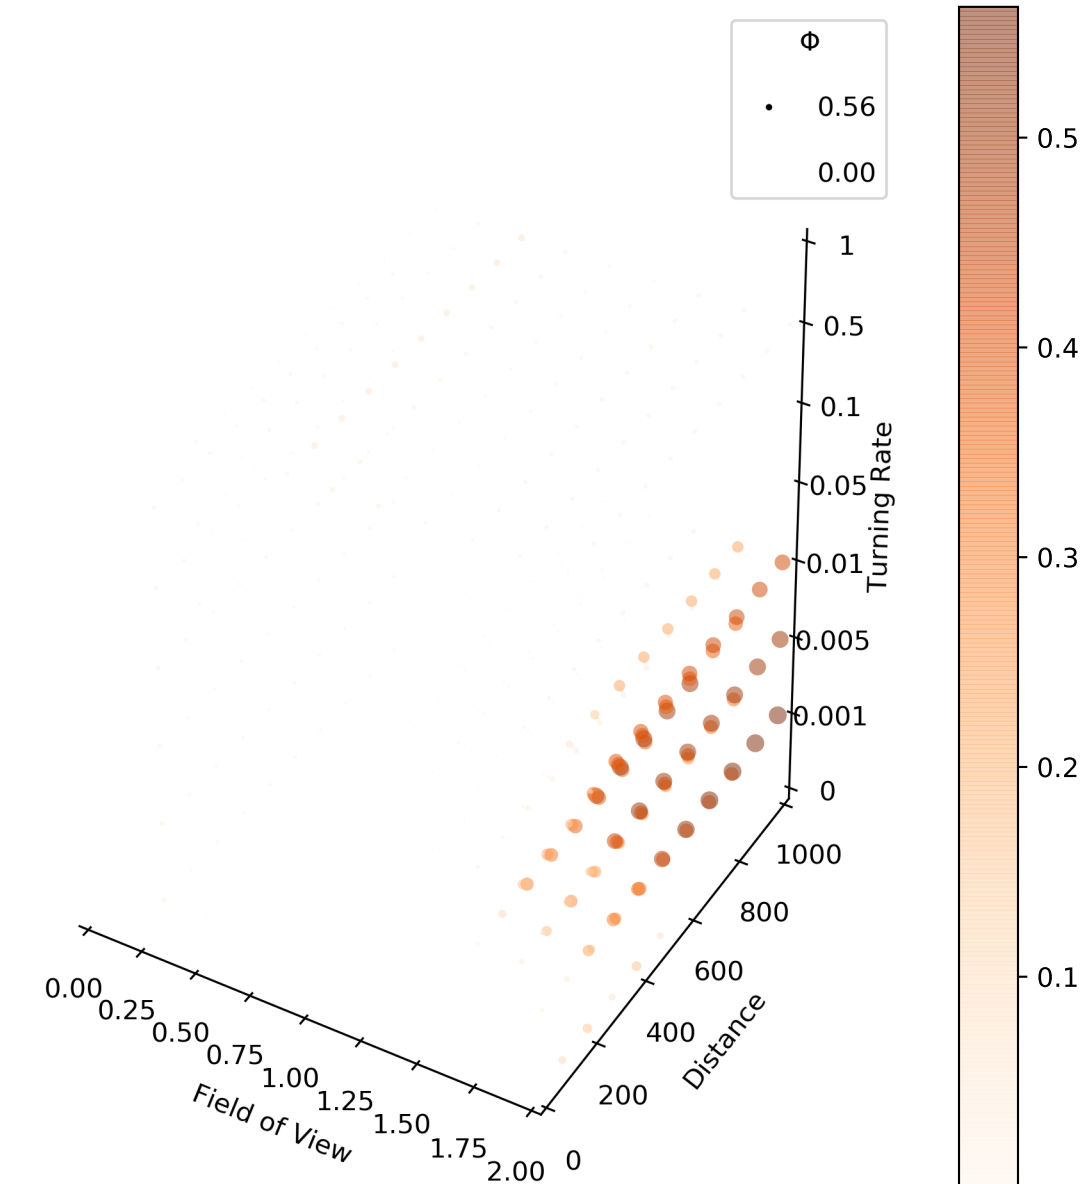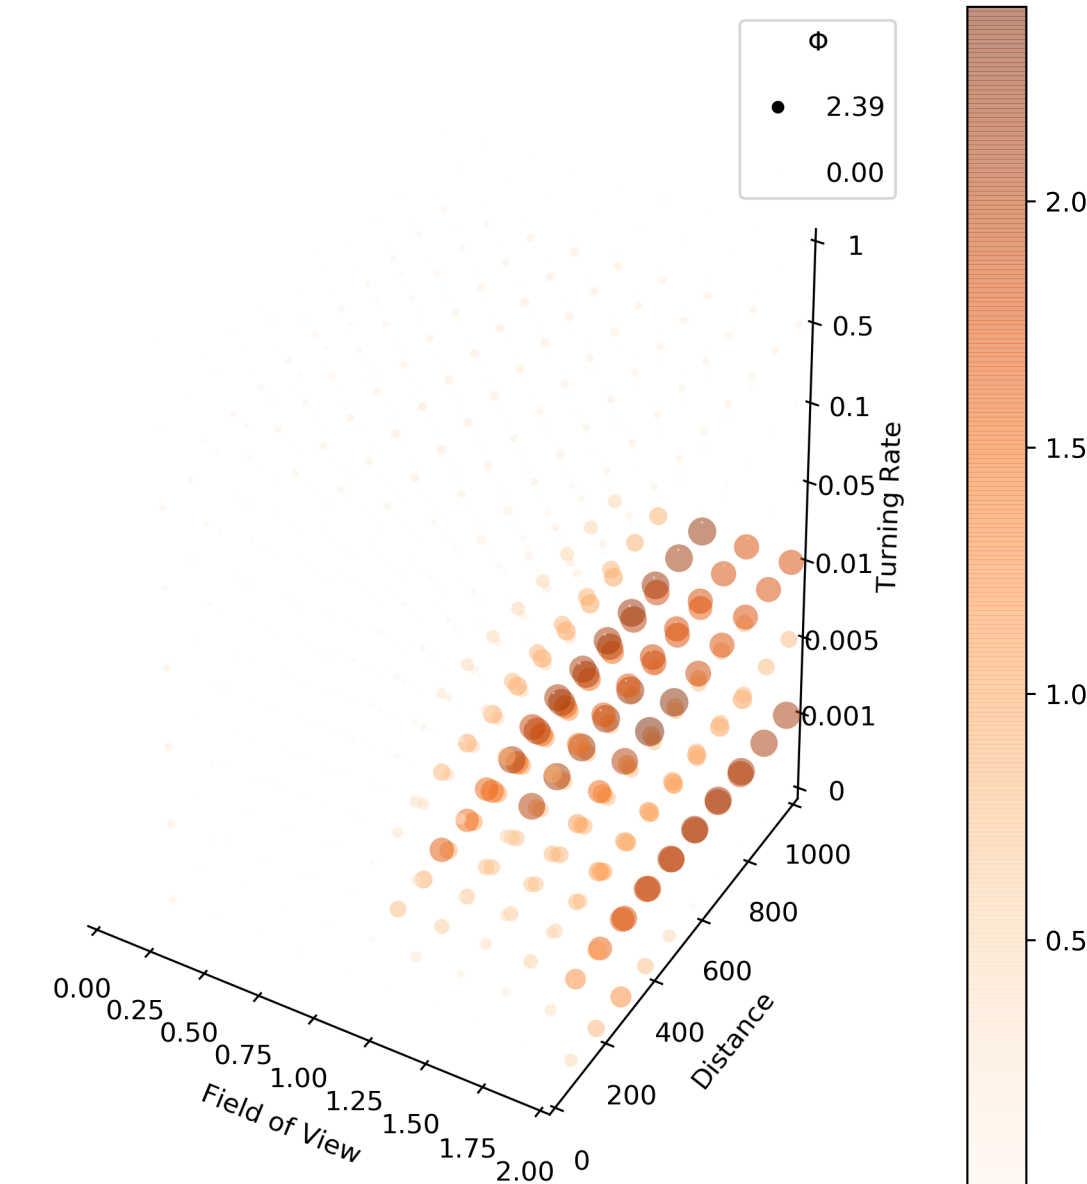

40/120

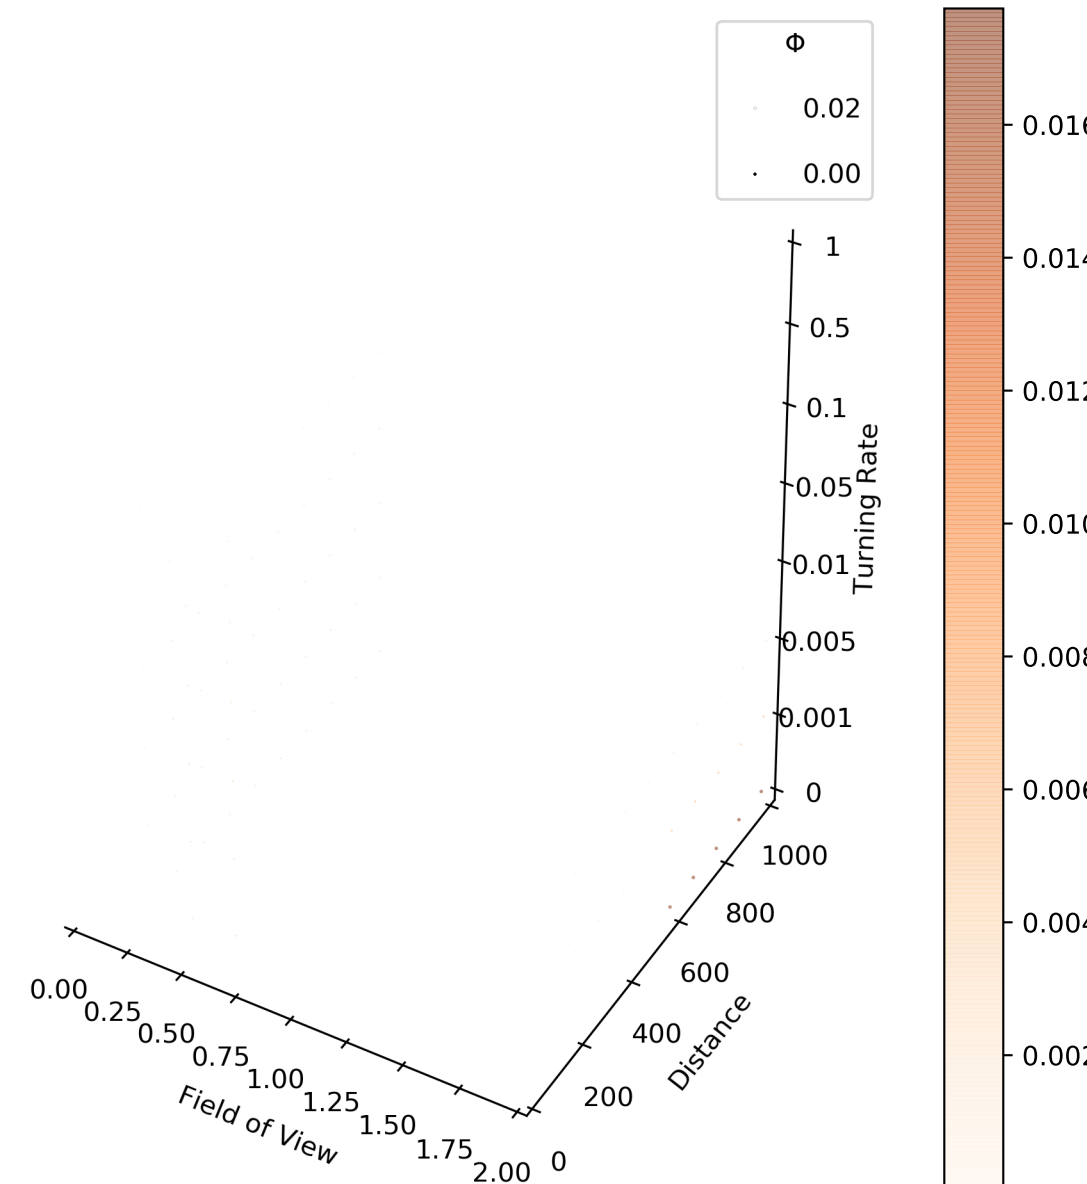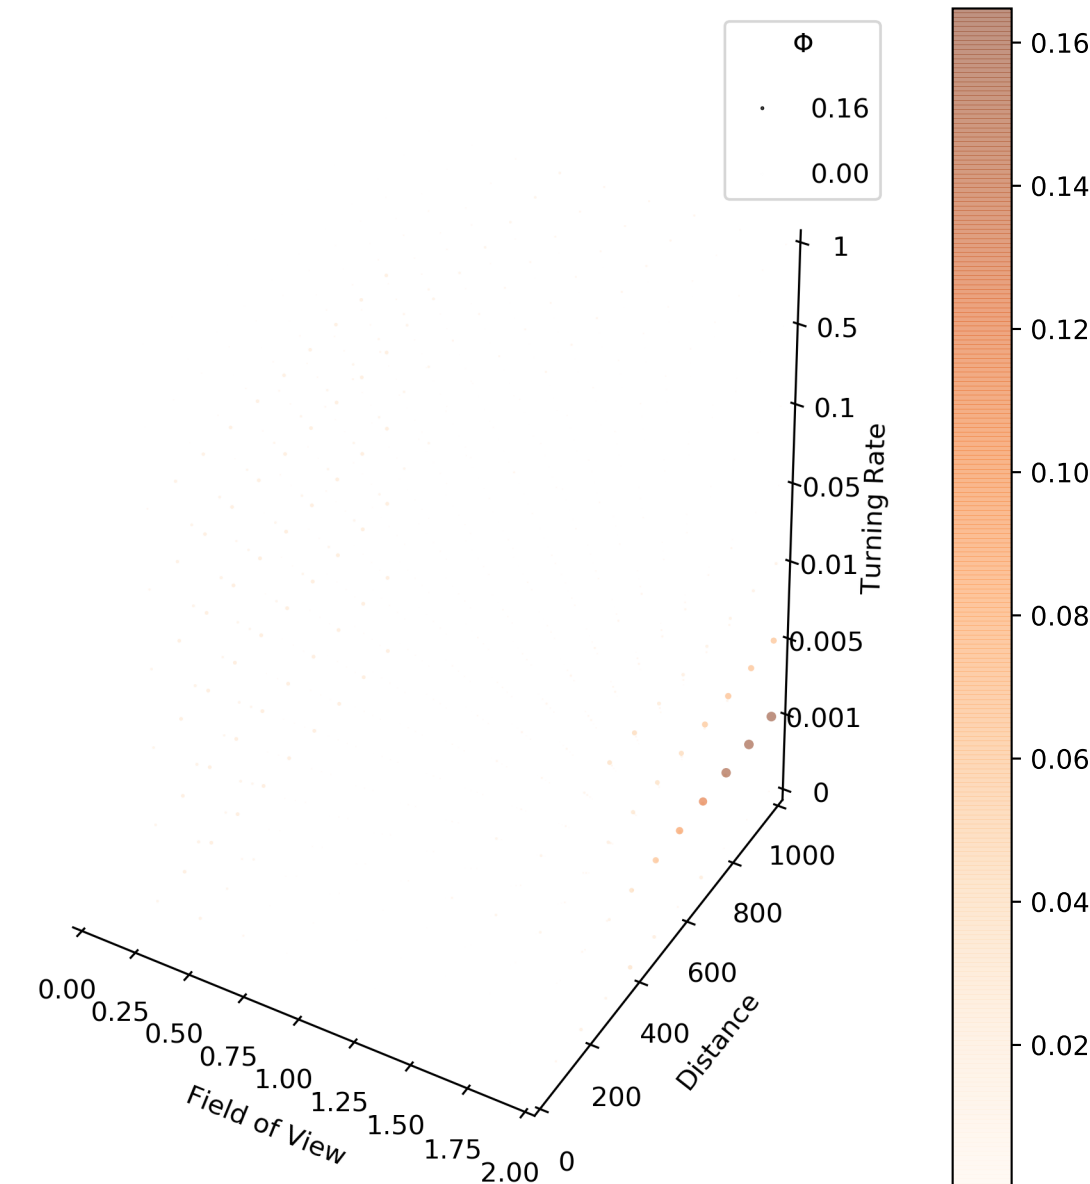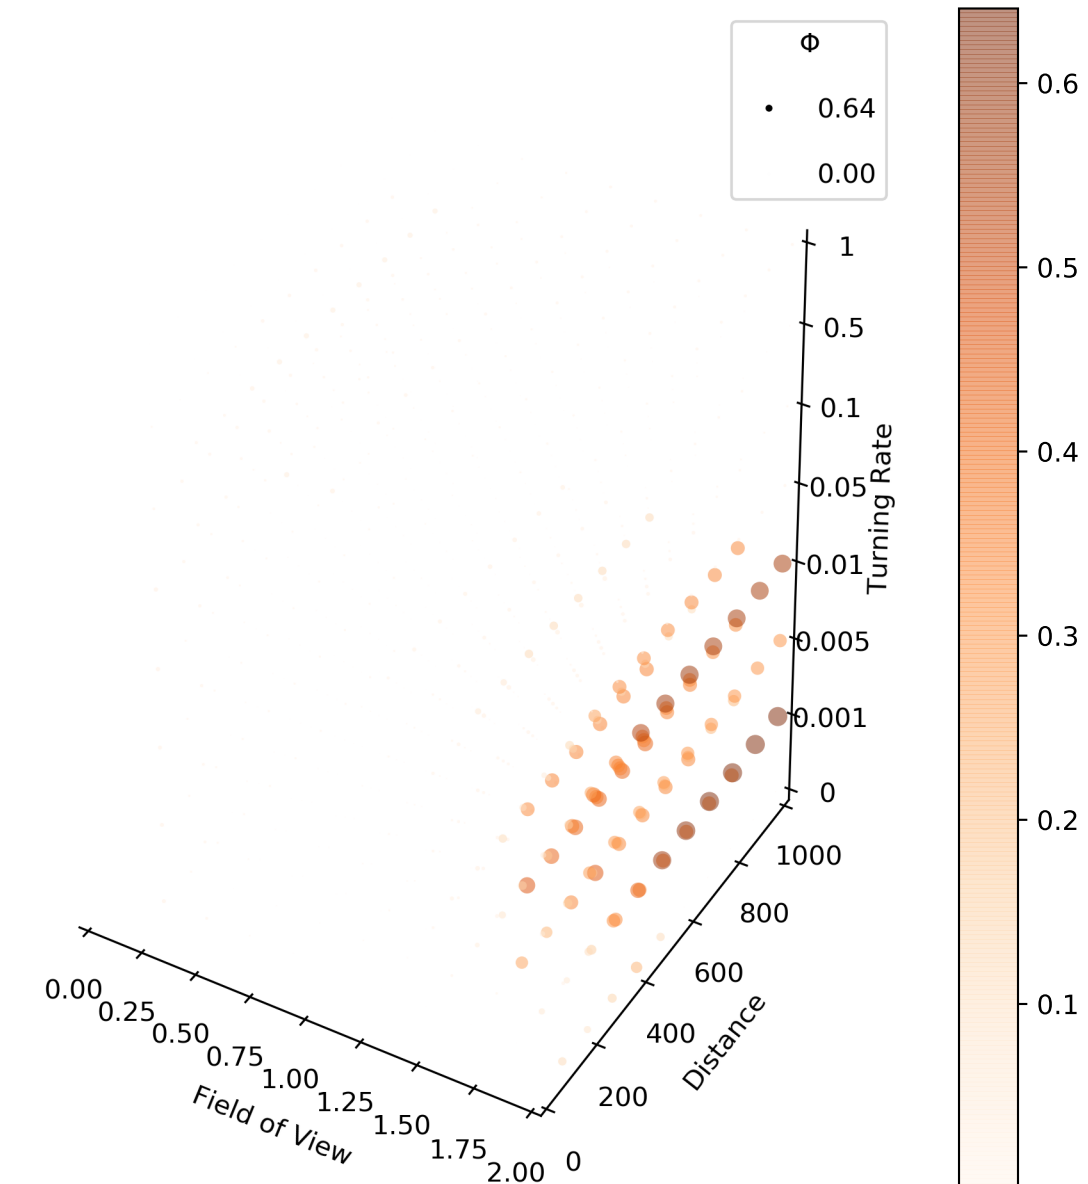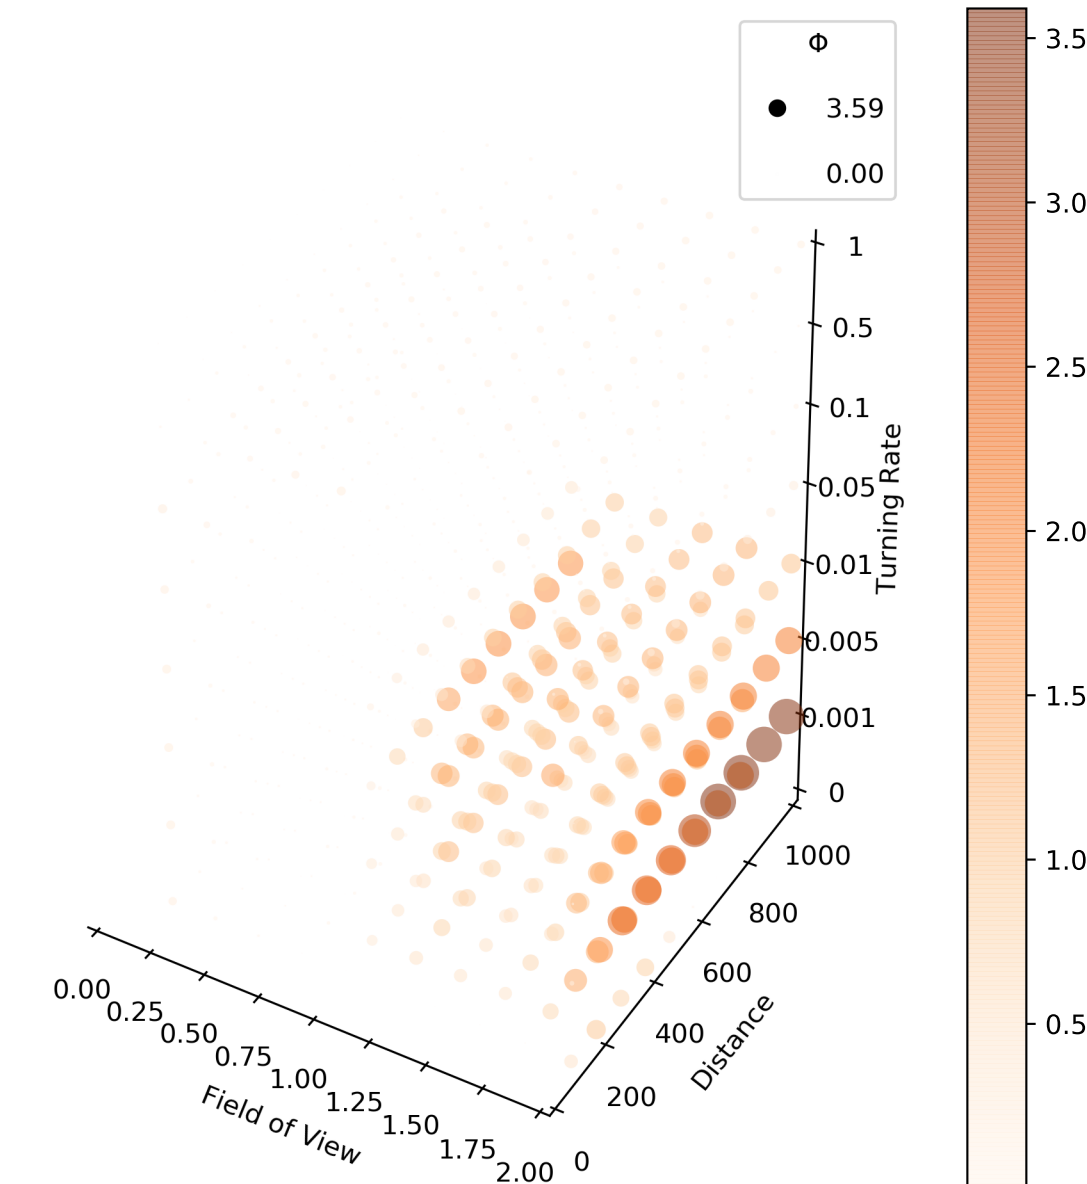

80/120

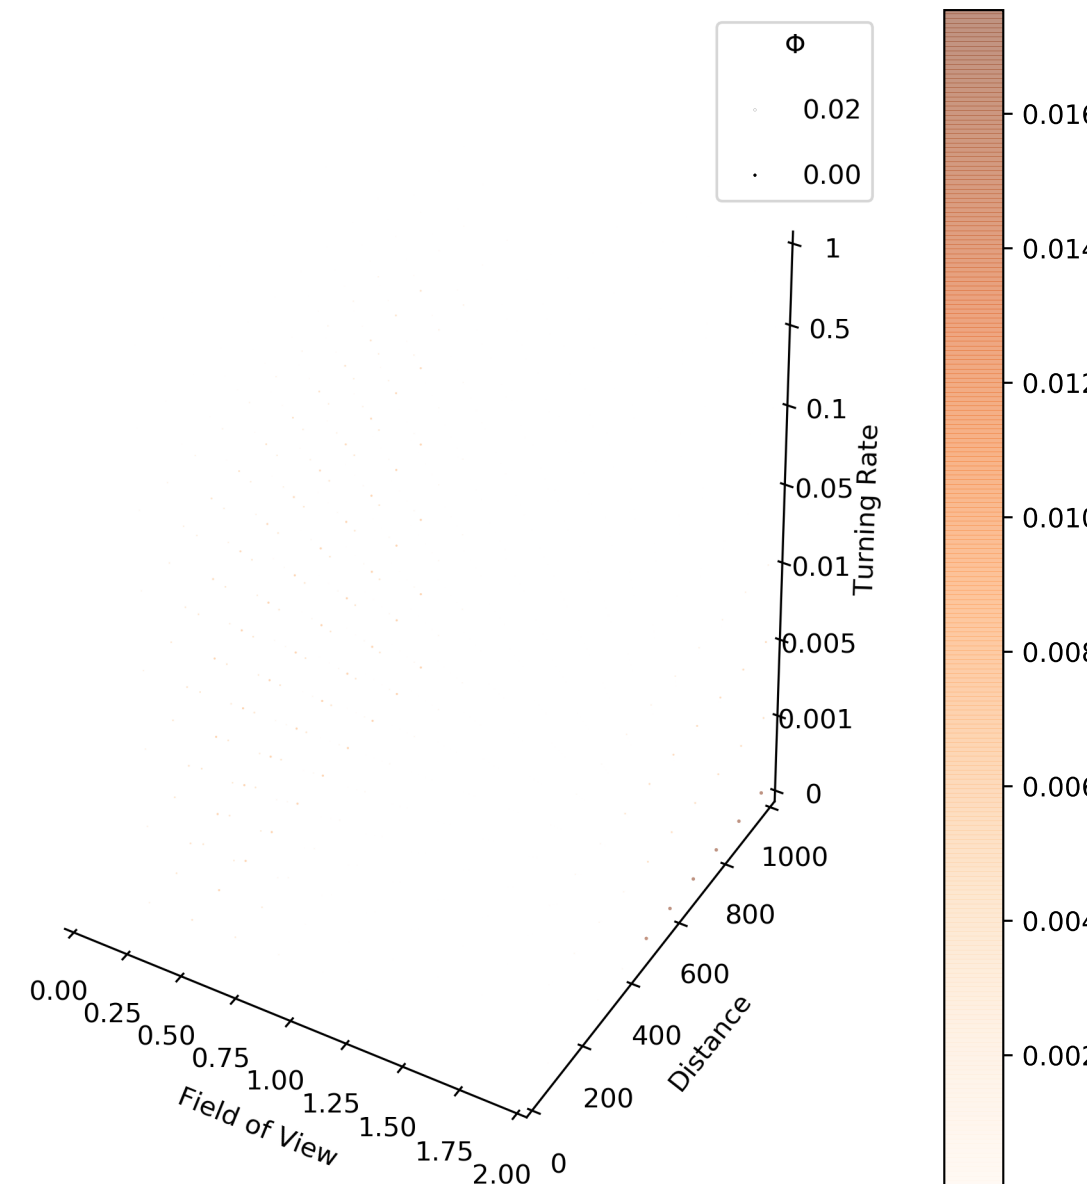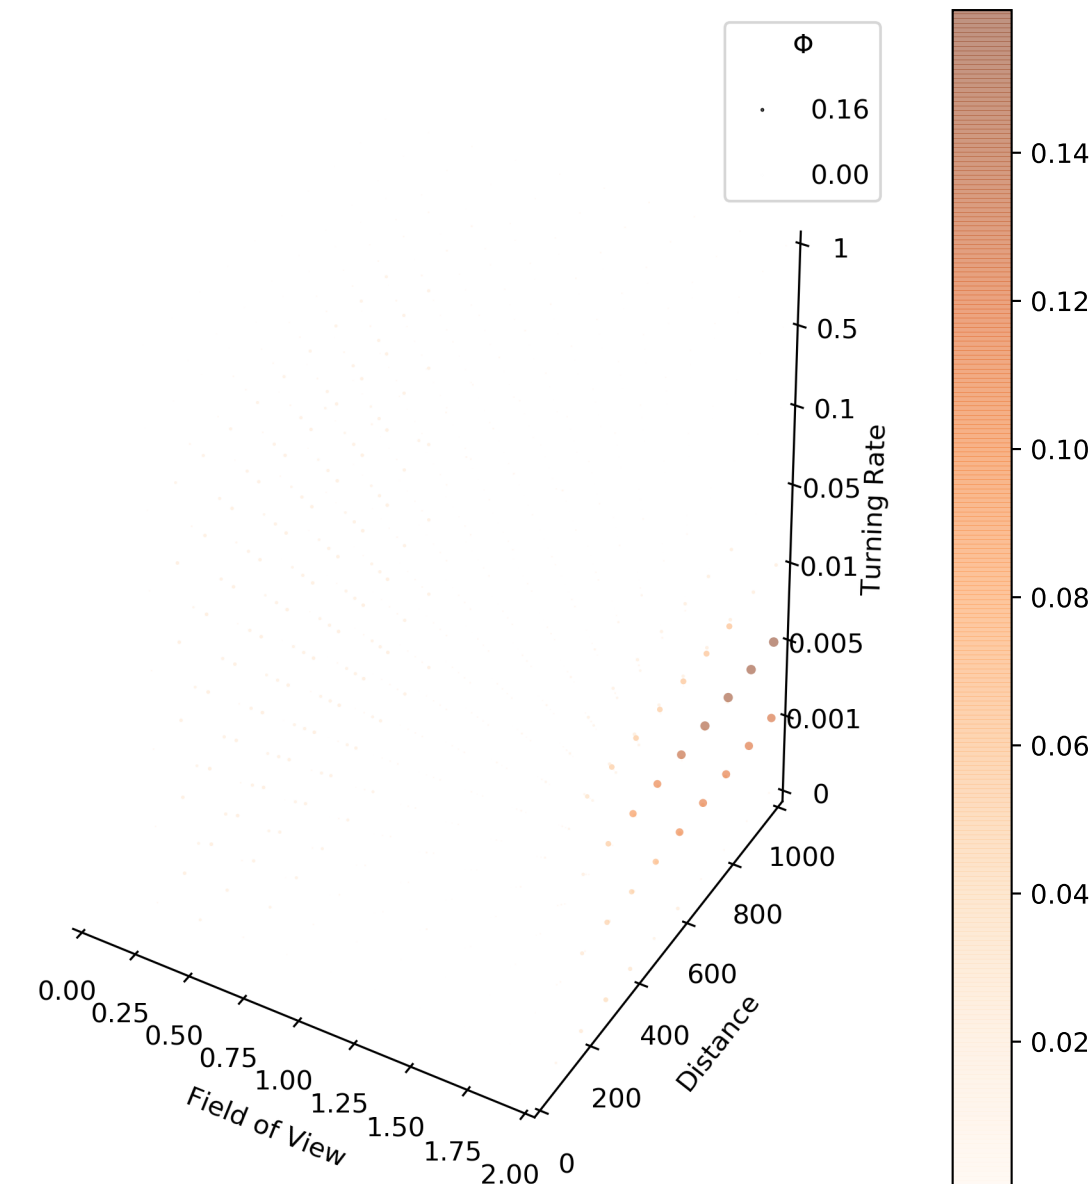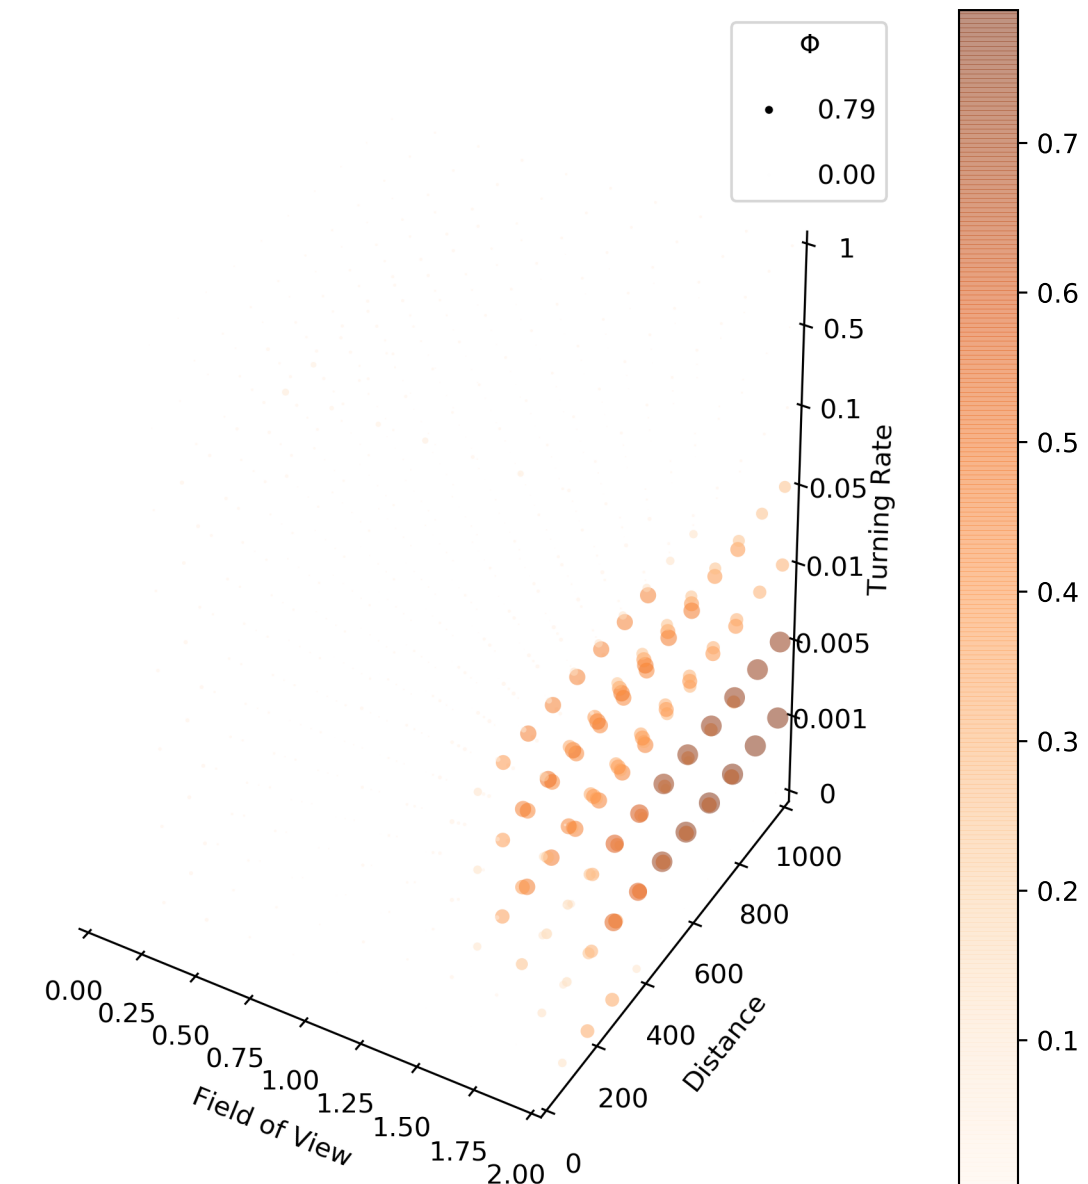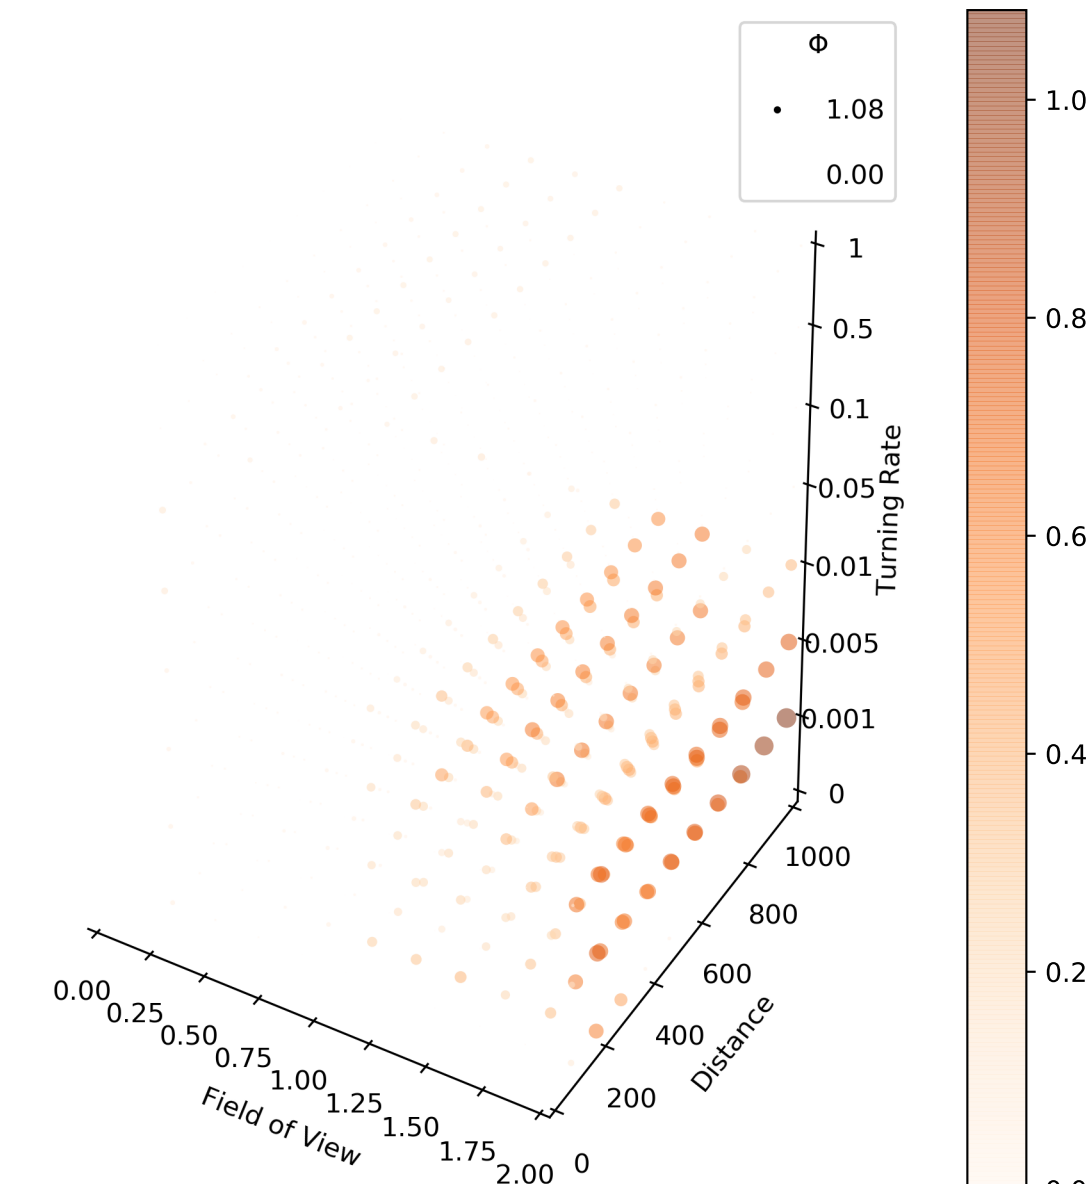

120/120

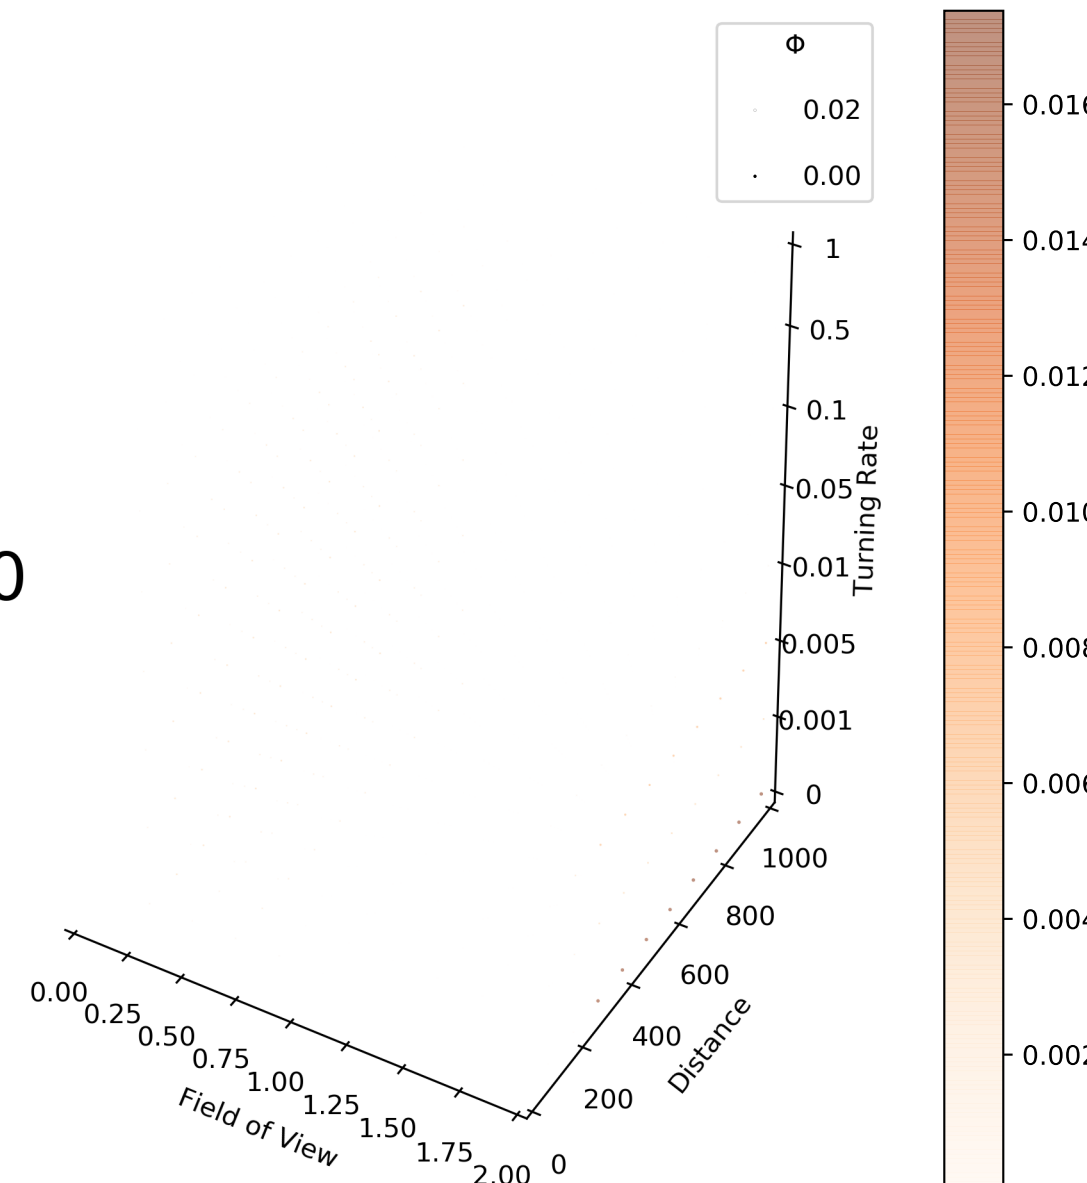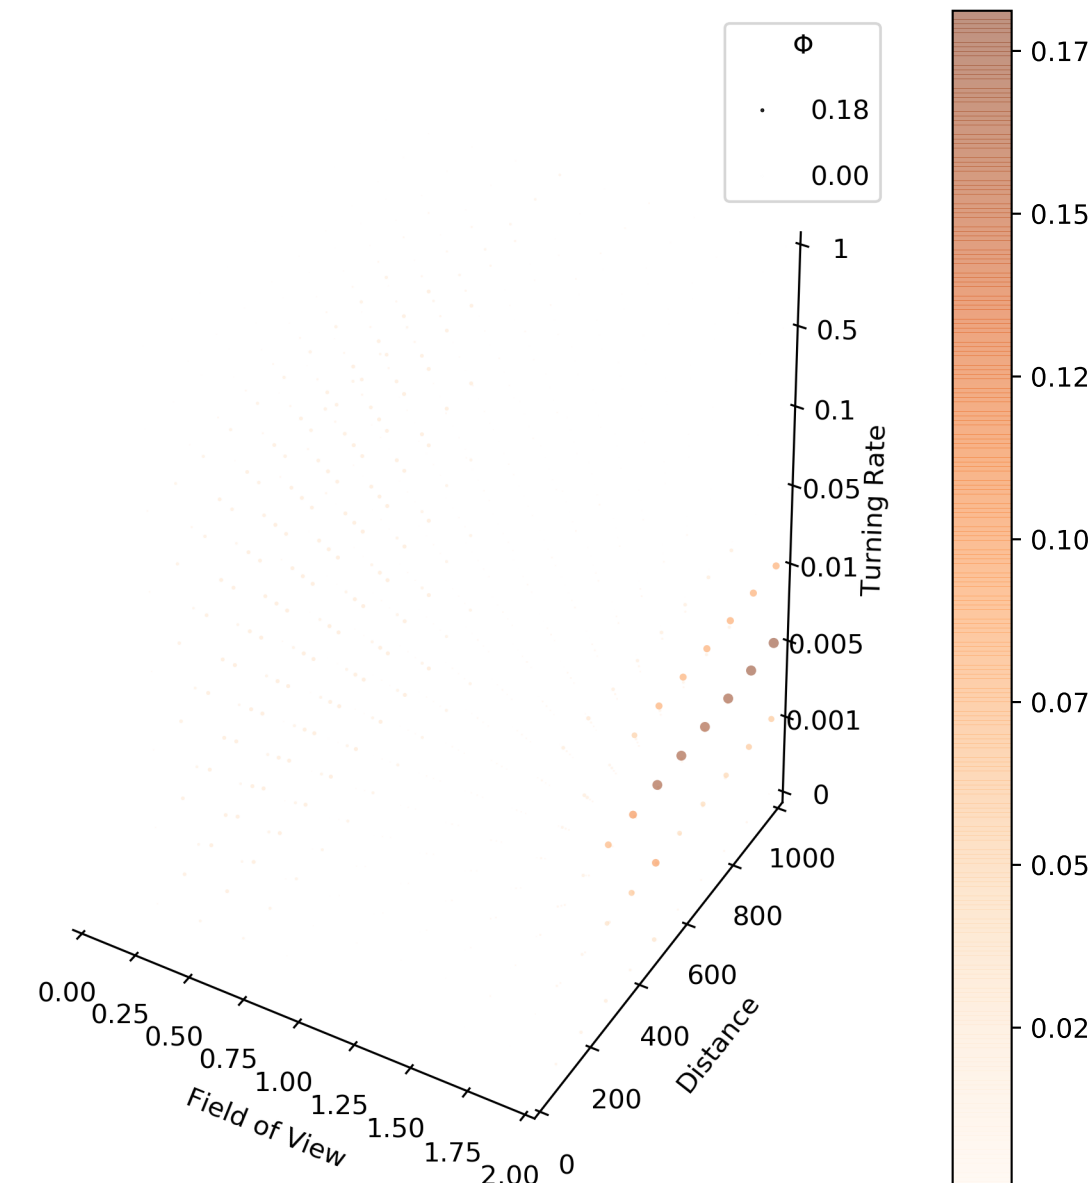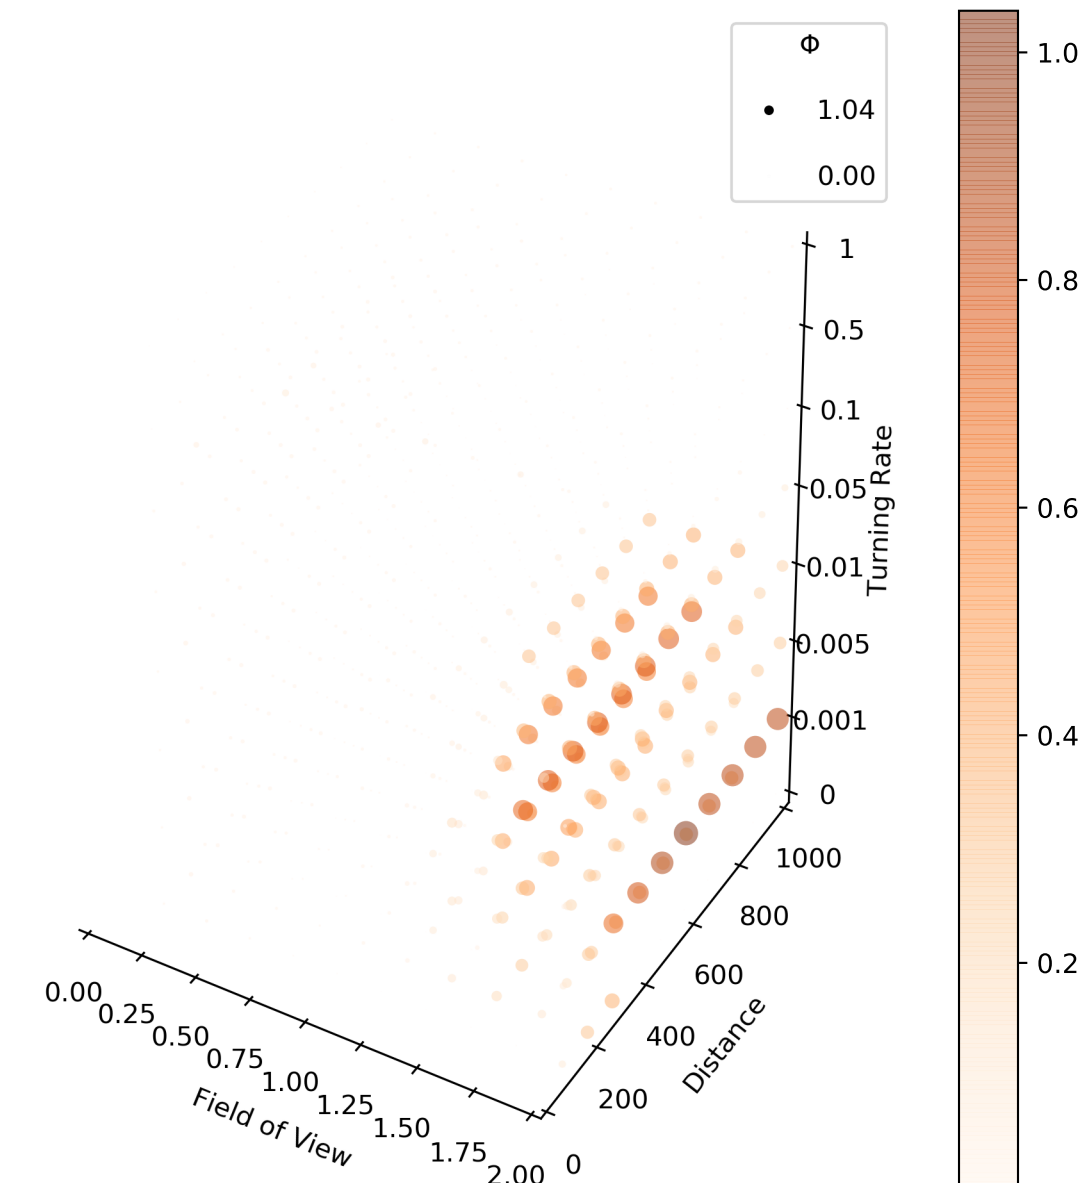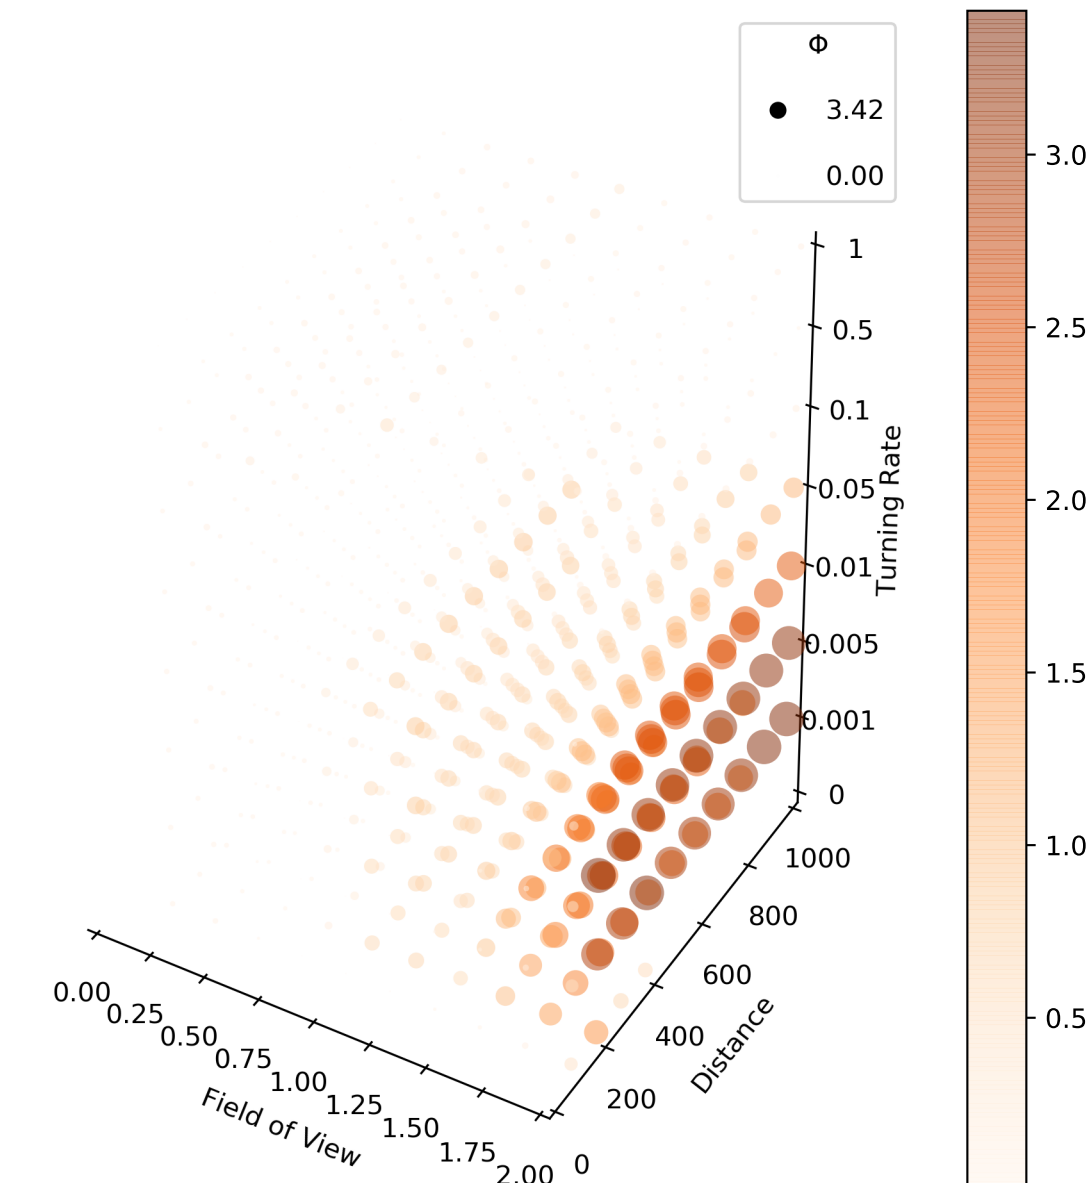

Supplement: Supplementary file 2 [file supplementary]

$\Delta t=5/120$

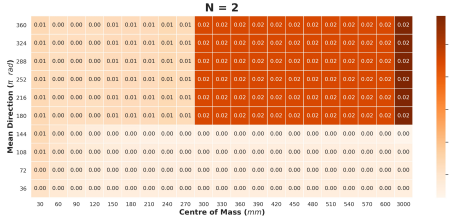

$\Delta t=10/120$

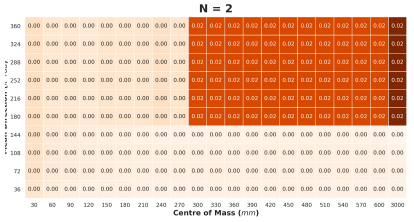

$\Delta t=20/120$

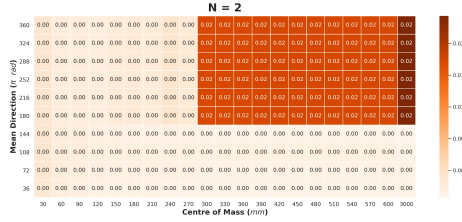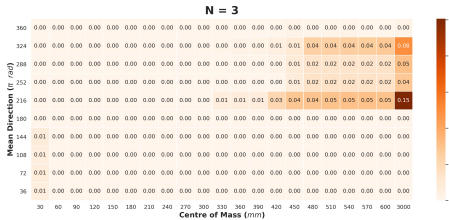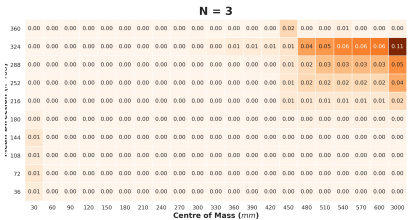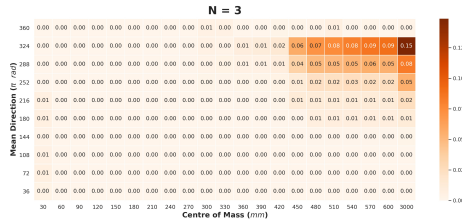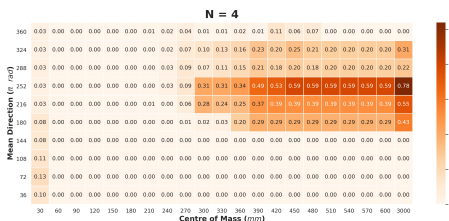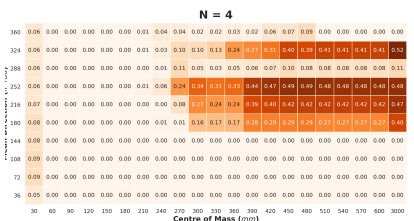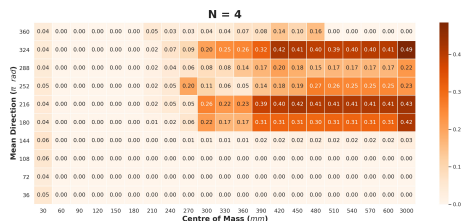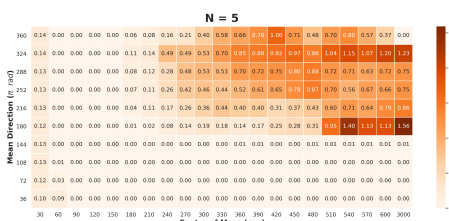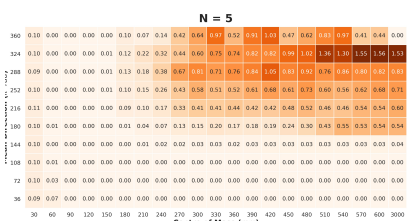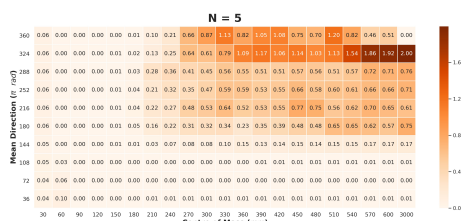

$\Delta t=40/120$

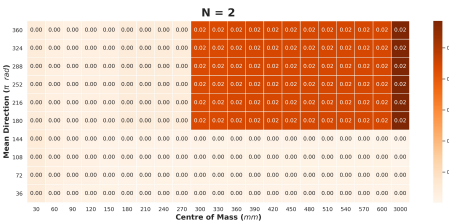

$\Delta t=80/120$

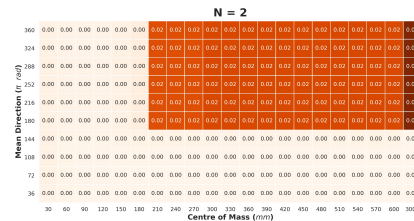

$\Delta t=120/120$

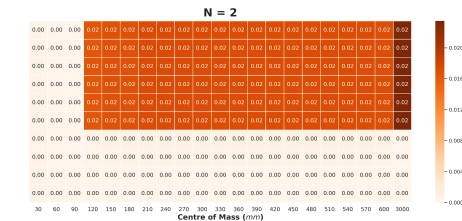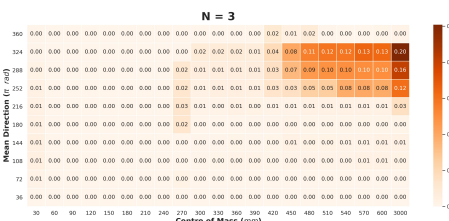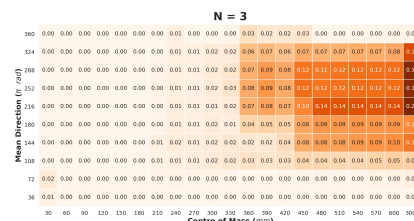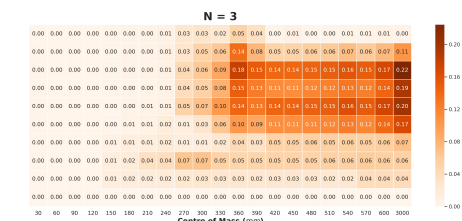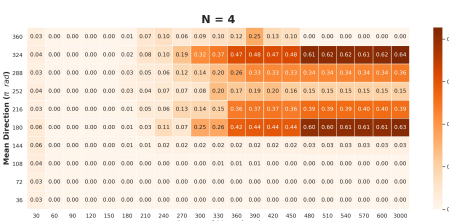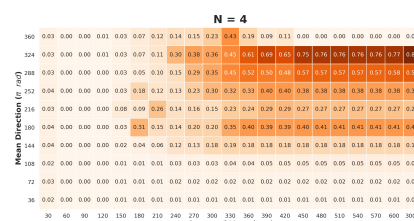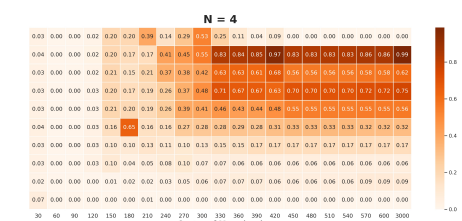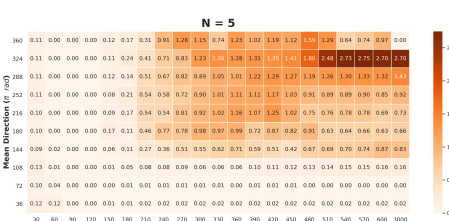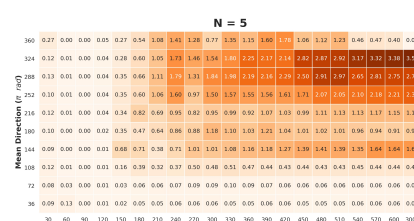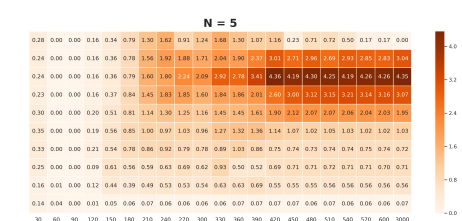

Supplement: Supplementary file 3 [file supplementary]
